**Nos3 mutation leads to abnormal neural crest cell and second heart field lineage patterning in bicuspid aortic valve formation**

**Joshua C. Peterson<sup>1,\*</sup>, Mary Chughtai<sup>1,\*</sup>, Lambertus J. Wisse<sup>1</sup>, Adriana C. Gittenberger-de Groot<sup>2</sup>, Qingping Feng<sup>3</sup>, Marie-José T.H. Goumans<sup>4</sup>, J. Conny VanMunsteren<sup>1</sup>, Monique R.M. Jongbloed<sup>1,2</sup>, Marco C. DeRuiter<sup>1,x</sup>**

**<sup>1</sup> Dept. Anatomy and Embryology, Leiden University Medical Center, Leiden, The Netherlands.**

**<sup>2</sup> Dept. Cardiology, Leiden University Medical Center, Leiden, The Netherlands.**

**<sup>3</sup> Dept. Physiology and Pharmacology, Schulich Medicine & Dentistry, Western University, London, Ontario, Canada.**

**<sup>4</sup> Dept. Molecular Cell Biology, Leiden University Medical Center, Leiden, The Netherlands.**

**\* Both authors should be considered as first author**

**x Corresponding author:**

**Marco C. DeRuiter, PhD**

**Dept. Anatomy and Embryology**

**Leiden University Medical Center**

**PO-Box 9600**

**2300RC Leiden**

**The Netherlands**

**Email: m.c.deruiter@lumc.nl**

**Telephone: +31.71.52.69308**

**Keywords:**

Nos3; bicuspid aortic valve; lineage tracing; embryo; development; outflow tract

**Summary statement**

The endothelial NOS3 mutation impacts neural crest and second heart field lineage patterning within the aortic valve. This affects outflow tract formation, as well as aortopulmonary angulation.

## Abstract

The bicuspid aortic valve (BAV), a valve with two instead of three aortic leaflets, belongs to the most prevalent congenital heart diseases in the world occurring in 0.5-2% of the general population. We aimed to understand how changes in early cellular contributions result in BAV and impact cardiovascular outflow tract development.

Detailed 3D reconstructions, immunohistochemistry and morphometrics determined that during valvulogenesis the non-coronary leaflet separates from the parietal outflow tract cushion instead of originating from an intercalated cushion.

*Nos3*<sup>-/-</sup> mice develop a BAV without a raphe as a result of incomplete separation of the parietal outflow tract cushion into the right and non-coronary leaflet.

Genetic lineage tracing of endothelial, second heart field and neural crest cells revealed altered deposition of neural crest cells and second heart field cells within the parietal outflow tract cushion of *Nos3*<sup>-/-</sup> embryos. The abnormal cell lineage distributions also affected the positioning of the aortic and pulmonary valves at the orifice level.

The results demonstrate that the development of the right and non-coronary leaflets are closely related. A small deviation in the distribution of neural crest and second heart field populations affects normal valve formation and results in the predominant right-non type BAV in *Nos3*<sup>-/-</sup> mice.

## 1. Introduction

The tricuspid aortic valve (TAV) has a crucial role in maintaining the unidirectional blood flow from the left ventricle into the systemic circulation. Abnormalities in aortic valve morphology, as seen in case of the bicuspid aortic valve (BAV), have been linked to valvular regurgitation, stenosis and progressive thoracic aortic aneurysm development (Ward, 2000; Subodh and C., 2014; Sievers *et al.*, 2015; Merks *et al.*, 2017). BAV is currently accepted as a congenital anomaly with a high incidence, occurring in 0.5-2% of the Western population (Roberts, 1970; Ward, 2000; Hoffman and Kaplan, 2002).

BAV is generally considered to be an abnormal fusion of aortic leaflets which occurs during embryonic development (Fernández *et al.*, 2009; Theron *et al.*, 2015; Odelin *et al.*, 2017). Although leaflet fusion might be a valid mechanistic explanation, there is currently no unequivocal data supporting this mechanism in BAV mouse models.

During embryonic development the heart starts as a single heart tube consisting of an outer layer of myocardium and an inner lining of endocardium. These layers are separated by a thick hydrophilic region of cardiac jelly, rich in extracellular matrix, hyaluronic-acid, glycosamino- and proteoglycans, produced by cardiomyocytes (Manasek, 1968). The primitive myocardium secretes factors, like Bmp2, in the cardiac jelly which induce the transition of endothelial cells into mesenchymal cells (EMT) (Sugi *et al.*, 2004). This process results in an invasion of endothelial-derived mesenchymal cells into the cardiac jelly (Eisenberg and Markwald, 1995; Kisanuki *et al.*, 2001). In the cardiac outflow tract (OFT) EMT results in the formation of a septal and a parietal cushions, the primordia of the myocardial OFT septum and the semilunar valves. Defects in cardiac jelly synthesis result in severely hypoplastic cushions due to failed EMT (Baldwin, Lloyd and Solursh, 1994; Camenisch *et al.*, 2000). Failure of EMT has been shown to result in bicuspid aortic valves (Thomas *et al.*, 2012; Mommersteeg *et al.*, 2015). BAV in *Nos3*<sup>-/-</sup> has also been suggested to be caused by early defects in EMT resulting in reduced mesenchyme populations in the outflow tract cushions (Fernández *et al.*, 2009; Liu *et al.*, 2013).

Migration of cardiac neural crest cells from the neuroectoderm into the OFT cushions induces the formation of the aortopulmonary (AP) septum, which divides the common OFT at the cardiac to vascular border into an aortic and pulmonary orifice and more proximally intracardiac into a right and left ventricular OFT (Waldo *et al.*, 1998; Jiang *et al.*, 2000; Gittenberger-De Groot *et al.*, 2005). During further development, the parietal cushion gives, at orifice level, rise to the right facing leaflets of the aortic and the pulmonary valve, while the septal cushion will develop into the left facing leaflets of both valves. Finally, the non-facing aortic leaflet and pulmonary leaflet are considered to be derived from separately developing

intercalated cushions on the posterior and anterior sides of the OFT, respectively (Kramer, 1942; Lin *et al.*, 2012). Although the development of the septal and parietal cushion has been studied intensively, the role of these intercalated cushions during development remains a challenging concept despite recent progress. (Anderson *et al.*, 2003; Lin *et al.*, 2012; Eley *et al.*, 2018; Mifflin *et al.*, 2018) For clarity of description of the valve leaflets and the correlation with the terminology used for the aortic leaflets in human patients with BAV we will refer to the aortic leaflets as right coronary (RC), left coronary (LC) and non-coronary (NC) leaflets (Sievers and Schmidtke, 2007). For the pulmonary semilunar valve leaflets we have chosen to use right facing (RF), left facing (LF) and a non-facing (NF) leaflets (Figure 1A-D).

It is well established that the aorta and aortic valve are developmentally related. Neural crest (Waldo *et al.*, 1998; Jiang *et al.*, 2000), endothelial (Eisenberg and Markwald, 1995; Kisanuki *et al.*, 2001), epicardial cell lineages (Gittenberger-de Groot *et al.*, 2012) and second heart field (SHF) (Zaffran and Kelly, 2012) derived cells contribute to both the ascending aorta, the aortic valve (Eley *et al.*, 2018; Mifflin *et al.*, 2018) and the various components of the aortic root (valvular leaflets, annulus, sinuses of Valsalva) (de la Cruz *et al.*, 1977; Kirby, Gale and Stewart, 1983; Waldo *et al.*, 2001). Mouse models of BAV show cushion formation to be an essential process during valve formation and defects in contributing cell lineages are known to result in BAV (Biben *et al.*, 2000; Lee *et al.*, 2000; Macatee, 2003; Laforest and Nemer, 2011; Makki and Capecchi, 2012; Thomas *et al.*, 2012; Mommersteeg *et al.*, 2015). In the present study, we examined the contributions of neural crest, endothelial and SHF lineages in aortic valve development of wild type and *Nos3*<sup>-/-</sup> mouse embryos to identify novel congenital aberrations involved in the formation of BAV. Understanding the fundamental embryology of these early cardiac lineages is crucial to address the challenges in BAV.

## 2. Methods

### 2.1. Embryonic Material

Cardiac outflow tract and aortic leaflet development was studied in a series developmental stages of *Nos3*<sup>-/-</sup> mice and compared to wild type mice of the same age. The following mice have been used in this study: *Nos3*<sup>-/-</sup> B6.129P2-NOS3tm1Unc/J mice (*purchased from Charles River Laboratories, Maastricht, Netherlands*), *Mef2C-Cre* mice were kindly provided by Dr. QuinPing Feng (Ontario, Canada) (Verzi *et al.*, 2005). B6.Cg-Tg(Wnt1-cre)2Sor/J (*purchased from Jackson laboratories, JAX stock #022501, Bar Harbor, USA*), *Tie2-Cre* mice were kindly provided by Dr. Bernd Arnold, (Heidelberg, Germany), B6.129(Cg)-Gt(ROSA)26Sortm4(ACTB-tdTomato,-EGFP)Luo/J, (mT/mG) (*purchased from Jackson laboratories, JAX stock # 007576, Bar Harbor, USA*). A breeding strategy was carried out to generate *Nos3*<sup>-/-</sup>;mT/mG, *Nos3*<sup>-/-</sup>; *Tie2Cre*;mTmG, *Nos3*<sup>-/-</sup>; *Wnt1Cre*;mT/mG; and *Nos3*<sup>-/-</sup>; *Mef2cCre*;mT/mG transgenic mouse lines mice which were used for lineage analysis. All mice were back crossed to the Black6 background using C57BL/6JLumc mice (*purchased from Leiden University Medical Center, Leiden, Netherlands*).

Adult mice were bred overnight and embryonic age was determined according to the presence of a vaginal plug the following morning. Noon of the day which the plug was first observed was taken as embryonic day (E)0.5. Embryos were isolated through hysterectomy at E10.5-E16.5 following dissection in phosphate buffer solution pH 7.4 (PBS). Tail biopsies were used for the isolation of genomic DNA for genotyping by polymerase chain reaction (PCR) targeted at *Cre* transgenes as for *Nos3* (Table S.1). All mice were handled according to the Guide for Care and Use of Laboratory Animals, as published by the NIH and the experiments were approved by the local LUMC animal welfare committee (dec14184).

### 2.2 Immunohistochemistry

For histological examination, embryos were fixed in 4% paraformaldehyde (0.1M, pH 7.4) for 24h at 4°C. Subsequently, they were embedded in paraffin, sectioned serially (5 µm), and mounted on glass slides. Samples were deparaffinized with xylene followed by a series of graded ethanol steps for rehydration into PBS. Endogenous peroxidase activity was inhibited by exposure of 0.3% H2O2 for 20 minutes. Slides were subjected to microwave antigen retrieval in citric acid buffer (10mM Citric Acid, 0.05% Tween 20 pH = 6.0) for 12 minutes at 97°C. Sections were incubated with primary antibodies against NKX2.5, eGFP, TROPOMYOSIN and PECAM1. Primary antibodies were diluted in PBS-Tween-20 with 1% bovine serum albumin (BSA, A8022; Sigma-Aldrich, St. Louis, MO, USA) to prevent non-specific binding. Between subsequent incubation steps all slides were rinsed twice in PBS

followed by a single rinse in PBS-Tween-20. Thyramide signal amplification (TSA PLUS biotin kit, NEL749A001KT, Perkin Elmer, Waltham, MA, USA) was used in NKX2.5 staining through addition of HRP labelled antibodies followed by thyramide amplification according to the TSA PLUS biotin kit manual. Primary antibodies were visualized by incubation with fluorescently labelled secondary antibodies, diluted in PBST for 60 minutes. Detailed antibody descriptions can be found in the supplementary table (Table S.2). DAPI (D3571, 1/1000; Life Technologies) was used as a nuclear stain and the slides were mounted with Prolong gold (Life Technologies).

### 2.3. Microscopic analyses and three-dimensional reconstructions

3D reconstructions of the embryonic hearts were made with Amira software 6.3 (Template Graphics Software Inc., Houston, TX, USA) using a selection of *Nos3<sup>-/-</sup>;Tie2Cre;mTmG*, *Nos3<sup>-/-</sup>;Wnt1Cre;mTmG* and wild type embryos respectively between E10.5 and E16.5 (Suppl. Table S.3). Tissue sections (5µm) were collected from paraffin embedded embryos and immunostaining was performed against NKX2.5, GFP, TROPOMYOSIN, PECAM1 and DAPI. Slides were scanned using the panoramic 250 flash III slide scanner (3DHISTECH Ltd., Budapest, Hungary) and images of identical scale and exposure were exported using Histech Panoramic Viewer (3DHISTECH Ltd., Budapest, Hungary). Subsequently, the photos were stacked and semi-automatically aligned in Amira. Relevant cardiac structures were labeled, based on morphology and stains. Surface views were executed to PDF formats by using Adobe Acrobat 9.5 software package.

### 2.4. Myocardial and endocardial cushion morphometry

The ventricular myocardium and the endocardial OFT cushion volumes were measured at ages E10.5 – E13.5 by using the stereological method described by Gundersen et al (Gundersen *et al.*, 1988). This method uses the random placement of evenly distributed points (grid) on to stained sections. Points within a tissue of interest are then counted on at least 10 sections after which a reliable estimation of the real tissue volume can be made. The measured ventricular myocardium and endocardial cushion volumes were compared between wild type (E10.5 N=3, E11.0 N=5, E11.5 N=5, E12.5 N=5) and *Nos3<sup>-/-</sup>* (E10.5 N=3, E11.0 N=4, E11.5 N=7, E12.5 N=6) embryos. A 100 mm<sup>2</sup> grid was used to measure the ventricular myocardium (E10.5-E13.5) and endocardial cushion (E10.5-12.5) volumes. At older ages (E12.5) a 225 mm<sup>2</sup> grid was used for the ventricular myocardium morphometry. The distance between two subsequently measured sections was 0,05 mm when measuring the myocardium and 0,025 mm for the endocardial cushions morphometry. An Olympus microscope was used with either a 40 or 100 times magnification, depending on the size of the heart.

## 2.5. Cell Lineage Analysis

Fluorescent images were collected using the panoramic 250 flash III slide scanner (3DHISTECH Ltd., Budapest, Hungary) or Leica Sp8 confocal microscopy (Leica Microsystems, Buffalo Grove IL, USA). Measurements were performed on aortic valves from transverse sections (5 $\mu$ m) of *wild type* C57BL/6JLumc (N=8), *Tie2Cre;mTmG*(N=5), *Wnt1Cre;mTmG* (N=4) and *Nos3<sup>-/-</sup>* B6.129P2-NOS3tm1Unc/J (N=8), *Nos3<sup>-/-</sup>;Tie2Cre;mTmG* (N=4), *Nos3<sup>-/-</sup>;Wnt1Cre;mTmG* (N=4). For each embryo all sections containing the heart were imaged. Image analysis was performed using a macro designed in Fiji (Schindelin *et al.*, 2012). The macro was designed to measure the nuclear volume of DAPI<sup>+</sup> nuclei bound by cytoplasmic GFP as for DAPI<sup>+</sup> nuclei lacking cytoplasmic GFP for each individual leaflet. Briefly, collected images (8-bit) were contrast stretched until 0.4% saturation was reached ensuring identical spectral intensity for all images. Leaflet perimeter of LC, RC and NC were manually selected and DAPI<sup>+</sup> nuclei found within a boundary of cytoplasmic GFP were measured as lineage specific nuclei. DAPI<sup>+</sup> nuclei lacking cytoplasmic GFP were added to the total volume of DAPI<sup>+</sup> nuclei in that individual leaflet. In case of BAV, leaflet perimeters between RC and NC would be defined following the shortest straight path from the observed endothelial infolding to the myocardial wall. Manual image threshold for GFP<sup>+</sup> cytoplasm was set at a pixel intensity of 120 and DAPI<sup>+</sup> thresholds were automatically detected using imageJ “default” algorithm. Following complete leaflet measurement, volumetric calculations were processed in Excel 2007 (Microsoft, Redmond, Washington, USA). Additional calculations as well as graphic and statistical analysis was performed in GraphPad Prism7.0 for Windows (GraphPad Software, La Jolla California USA).



## 2.6. Angle measurement aorta and pulmonary trunk

Angle measurements of the aorta and pulmonary trunk were performed on wild type TAV (N=12), *Nos3*<sup>-/-</sup> TAV (N=12), and *Nos3*<sup>-/-</sup> BAV (N=10). Serial slides stained with Resorcin Fuchsin were stacked and aligned with the Amira software version 6.3. Two planes were created through the top of the three commissure attachments of the aorta and pulmonary valves. In case of BAV the plane was set at the top of the two commissures and the plane perpendicular was determined by the smallest diameter of the aorta. The plane normal of both the aortic valve (dot vector  $v_{\text{aorta}}$ ) and pulmonary valve (dot vector  $v_{\text{pulm}}$ ) could then be determined. The angle between the aorta and pulmonary valves was calculated using the formula

$$\cos(\alpha) = \frac{V_{\text{aorta}} \cdot V_{\text{pulm}}}{|V_{\text{aorta}}| \cdot |V_{\text{pulm}}|}$$

## 2.7 Extracardial lineage analysis

Extracardial lineage analysis was performed on wild type C57BL/6JLumc (N=3) and *Nos3*<sup>-/-</sup> B6.129P2-NOS3tm1Unc/J (N=3) embryos at stage E11.5. Immunostainings were performed using anti-NKX2.5 and anti-AP2 $\alpha$  antibodies to visualize SHF and neural crest cells respectively. Detailed antibody descriptions can be found in the supplementary table (Table S.2). 3D reconstructions and volumetric measurements of the extracardiac region adjacent to the cardiac outflow tract up to but not including the pharyngeal endoderm were made using Amira software 6.3 (Template Graphics Software Inc., Houston, TX, USA) and further processed in GraphPad Prism 7.0 for Windows (GraphPad Software, La Jolla California USA).

## 2.8. Statistical analysis

Results are represented as mean  $\pm$  SD of at least three independent experiments. Comparisons were made using unpaired two tailed Student's *t*-test or One-way ANOVA test if data comparison involved more than two groups followed by Tukey's multiple comparisons test. Significance was assumed when  $p < 0.05$ . Statistical analysis was performed in GraphPad Prism 7.0 for Windows (GraphPad Software, La Jolla California USA).

### 3. Results

#### 3.1 Morphological landmarks in bicuspid *Nos3<sup>-/-</sup>* mice

Seventy-three percent of *Nos3<sup>-/-</sup>* embryos had a normal TAV while 27% develop a BAV (Table S.4). In *Nos3<sup>-/-</sup>* embryos, the bicuspid valve had two similar sized leaflets in a left-right leaflet orientation without a visible raphe that indicated the position of a possible third commissure (Fig. 1A-B). The lack of a raphe did not allow for discrimination between a R-N (a fusion/confluence of RC and NC leaflets) or L-N (a fusion/confluence of LC and NC leaflets) type BAV solely on the basis of morphological aspects. In wild type mice the three parabolic-shaped leaflets are embedded within the aortic root. Distally, at the sinotubular junction, these structures formed three interleaflet commissures. In contrast to wild type, bicuspid *Nos3<sup>-/-</sup>* mice developed a commissure (arrowheads, Fig. 1A-B) opposite to the facing commissure (arrow, Fig. 1A-B).

#### 3.2 Incomplete separation of the parietal cushion leads to R-N BAV in *Nos3<sup>-/-</sup>* embryos

The first indications of leaflet formation could be observed at E12.0 at which the putative aortic valve leaflets consisted of the parietal and septal cushions and a slight indentation of endothelial cells was present in both wild type and *Nos3<sup>-/-</sup>* embryos (Fig.1E-F, arrowheads). At E12.5 a marked separation of the parietal cushion was observed in wild type embryos. The RC and NC leaflet could be distinguished by the presence of an endothelial infolding into the cushion (Fig. 1G, arrowhead). Bicuspid *Nos3<sup>-/-</sup>* embryos did not develop this marked endothelial infolding causing an incomplete separation of the parietal cushion into a NC and RC leaflet (Fig. 1H). This resulted in the formation of a single right valvular leaflet, leading to a R-N BAV. Moreover, there was no indication of intercalated cushion development in wild type embryos between the parietal and septal cushion between E10.5 and E12.5. (Fig. S.1).

#### 3.3 Aortic leaflets develop solely from the parietal and septal cushions

The early OFT cushion formation started around E10.5 in wild type mice with the production of cardiac jelly within the interstitial space between the outer myocardial wall and inner endocardial lining, followed by migration of endocardial derived cells into two compartments resulting in the two OFT cushions, the parietal and septal cushions (Fig. S.1). During cellularization the two cushions remained interconnected by two thin transitional zones. The transitional zones are two distinct regions which connect the parietal and septal cushion over the complete length at both ends and are characterized by their composition of mostly cardiac jelly, virtually devoid of cells (Fig. 2A, Fig. S.1). At E10.5 and E11.0, the parietal cushion was positioned ventrolateral in the cardiac outflow tract whereas the septal cushion

was located more dorsomedial (Fig 2A-B). Extracardiac SHF cells could be observed immunohistochemically as non-myocardial (TROPOMYOSIN (TM) negative) cells expressing nuclear NKX2.5 (Waldo *et al.*, 2001) (Fig. S2). NKX2.5<sup>+</sup>/TM<sup>-</sup> SHF cells (yellow) migrated via the pharyngeal arteries into the distal parts of the parietal and septal cushions into the cardiac outflow tract (orange) (Fig. 2, S.3). From E11.5 onwards the future pulmonary outflow tract changed from a left medial position to a more ventral position with regard to the future aortic ostium, corresponding to a clockwise rotation (Fig. 2C-E, S.3C-E). This phenomenon has been described to result from the asymmetric addition of SHF cells to the pulmonary side of the OFT, the so called “pulmonary push” (Scherptong *et al.*, 2012). The parietal cushion became positioned more dorsal and the septal cushion more ventral (Fig. 2D-E). At this stage, the NKX2.5<sup>+</sup>/TM<sup>-</sup> SHF cells form a distinct group of cells in the septal and parietal cushions close to the transitional zones (cyan) (Fig. S.3D-E). The transitional zones in between the septal and parietal cushions remained sparsely populated by cells. The interleaflet commissures of the LC and NC aortic leaflets as well as the LF and NF pulmonary leaflets developed at these transitional zones. The pulmonary NF leaflet also derived from a main OFT cushion. In this case the septal cushion. The timing is somewhat different in that this occurred at E12.0 (Fig. 2D), whilst the separation of the aortic NC leaflet from the parietal cushion occurred, somewhat later, at E12.5 (Fig. 2E). The septal cushion therefore gave rise to three leaflets being the LC aortic leaflet as well as the LF and NF pulmonary leaflets. The parietal cushion also gave rise to three leaflets being the RC and NC aortic leaflets as well as the RF pulmonary leaflet (Fig. 2E).

#### 3.4. *The volume of the myocardium and the outflow tract cushions are not affected in the Nos3<sup>-/-</sup> embryos*

Developmental growth of the OFT cushions could be determined by a decrease in acellular fraction volume (as a measure for the amount of cardiac jelly) and an increase in cellular fraction volume containing cell bodies. Histological image examination determined no difference ( $p > 0.05$ ) in cushion composition of the septal and parietal cushions between *Nos3<sup>-/-</sup>* and wild type embryos from stages E10.5-E12.5 (Fig. S.4A-B). These findings indicate that defects in *Nos3<sup>-/-</sup>* embryos were not caused due to a reduction in total cell volume or changes in cardiac jelly production. Furthermore, no differences were found in heart size based on ventricular myocardial volume measurements between wild type and *Nos3<sup>-/-</sup>* embryos at embryonic age E10.5- E13.5 indicating that the myocardial growth rate is unaffected by the *Nos3* mutation (Fig. S.4C).

### 3.5. Aortic and pulmonary leaflets harbour unique cell lineage distributions

The use of the Cre-loxp system allowed the study of cellular offspring by genetically labelling original progenitor cells (Sauer and Henderson, 1988; Nagy, 2000). By combining genetic lineage tracing and antibody staining it was confirmed that the NKX2.5<sup>+</sup>/TM<sup>-</sup> population within the NC leaflets of the aorta are of SHF descent and that these do not colocalize with endothelial (Fig. S.5A) or neural crest derived populations (Fig. S.5B), but are a subpopulation of the *Mef2c*-derived SHF cells (Fig. S.5C). These NKX2.5<sup>+</sup>/TM<sup>-</sup> SHF populations are also found in the NF leaflet in the pulmonary orifice (Fig. S.5D-F). Recently a study by Mifflin et al and Eley et al have identified similar populations in the NC leaflet of the aorta (Eley et al., 2018; Mifflin et al., 2018).

Cell lineage image quantification determined specific regions in the aortic valve to which early cardiac cell lineages contributed. In wild type embryos, the majority of NKX2.5<sup>+</sup>/TM<sup>-</sup> SHF cells contributed to the NC leaflet (Fig. 3A,D), whereas cells of neural crest origin primarily contributed to the LC and RC leaflets (Fig. 3C,F). Similar neural crest patterns have also been reported in other studies (Phillips et al., 2013; Odelin et al., 2017). Interestingly, endothelial derived cells were equally distributed among the aortic leaflets in wild type embryos (Fig. 3B,E).

### 3.6. The distribution of the SHF and NCC in cardiac outflow tract is affected in the *Nos3*<sup>-/-</sup> embryos

The total leaflet volume between wild type and *Nos3*<sup>-/-</sup> embryos did not differ (Fig. S.6). *Nos3*<sup>-/-</sup> embryos had a significantly reduced population of neural crest derived cells in the RC leaflet when compared to aged matched wild type embryos (Fig. 4A). Moreover, larger contribution of NKX2.5<sup>+</sup>/TM<sup>-</sup> SHF cells was observed in the LC (Fig. 4B) and NC (Fig. 4C) leaflet in *Nos3*<sup>-/-</sup> embryos. Although all *Nos3*<sup>-/-</sup> embryos had defects in neural crest and SHF populations, only 27% of *Nos3*<sup>-/-</sup> embryos develop a BAV, as reported in earlier studies of *Nos3*<sup>-/-</sup> mice (Table S.4 and (Fernández et al., 2009)).

These results show that an altered distribution of neural crest and SHF populations is present in the developing abnormal leaflets of BAV (Fig. 4D-I). Three dimensional reconstruction of the neural crest and SHF populations within the leaflets showed that these regional lineage disturbances were accompanied by rotational anomalies within the annulus impacting commissure positioning in *Nos3*<sup>-/-</sup> embryos (Fig. 4J-L). As a result the left commissure developed more dorsal in *Nos3*<sup>-/-</sup> BAV when compared to wild type TAV and

*Nos3*<sup>-/-</sup> TAV embryos (Fig. 4J-L). Measurement of extracardial SHF and neural crest populations showed equal volume outside the heart which indicates that these cell populations are most probably not affected prior to their homing into the cardiac cushions (Fig. S.7).

The aortic and pulmonary valve developed at an angular offset within the OFT of tricuspid wild type embryos (Fig. 5A). NKX2.5<sup>+</sup>/TM<sup>-</sup> SHF cells (Fig. 5D) and neural crest derived cells (Fig. 5G) were located deep within the OFT cushions in wild type embryos. These neural crest derived cells contributed to the formation of the AP septum located centrally between the aortic and pulmonary valves (asterisk, Fig. 5G). In the OFT of *Nos3*<sup>-/-</sup> embryos NKX2.5<sup>+</sup>/TM<sup>-</sup> SHF and neural crest derived cells were located more proximal to the semilunar valves in both *Nos3*<sup>-/-</sup> TAV (Fig. 5B,E,H) and *Nos3*<sup>-/-</sup> BAV (Fig. 5C,F,I). *Nos3*<sup>-/-</sup> TAV embryos showed proper leaflet separation but slight changes in the position of the AP septum were observed (asterisk, Fig. 5B,E,H). These effects were more pronounced in BAV *Nos3*<sup>-/-</sup> embryos where the aortic valve was oriented more dorsally with regard to the pulmonary valve and changes in position of the AP septum were exacerbated (Fig. 5C,F,I).

Measurement of the position of the aortic valve in relation to that of the pulmonary valve (protractor, Fig. 5A-C) revealed that the angle between the aortic and pulmonary valves was significantly smaller in both tricuspid *Nos3*<sup>-/-</sup> and bicuspid *Nos3*<sup>-/-</sup> when compared to wild type mice ( $P < 0.01$  and  $P < 0.0001$ , respectively) (Fig. 5J). Moreover, TAV *Nos3*<sup>-/-</sup> and BAV *Nos3*<sup>-/-</sup> embryos were also found to be significantly different ( $P < 0.05$ ), indicating that the underlying changes in cell distribution may also affect annulus formation in tricuspid *Nos3*<sup>-/-</sup> mice.

#### 4. Discussion

Patients with a BAV are at an increased risk of developing aortopathy. The great vessels and the aortic valve have a similar developmental origin involving contributions of endothelial, neural crest and second heart field lineages. Understanding the exact role of these early cell lineages during leaflet development and outflow tract formation may lead to more accurate patient risk stratification and improved treatment strategies.

In this study the formation of the aortic valve in wild type and *Nos3*<sup>-/-</sup> mouse embryos was studied to identify congenital cell lineage aberrations involved in the formation of bicuspid aortic valves.

To the best of our knowledge, we describe for the first time that the non-facing leaflets of the aortic and pulmonary valves arise from a process of cushion separation of the parietal and septal cushions during development. This finding contradicts previous studies which argued that the formation of the non-facing leaflets developed from separate intercalated cushions (Kramer, 1942; Qayyum *et al.*, 2001; Anderson *et al.*, 2003; Lin *et al.*, 2012; Eley *et al.*, 2018; Mifflin *et al.*, 2018). The morphological events leading to semilunar valve formation is a challenging concept to represent in a 2D-plane due to complex 3D outflow tract remodelling. Interpretations based on 2D histological sections may result in an incomplete view of the morphological changes throughout development. Moreover these rapid morphological changes require short intervals in between observations and 3D reconstructions for accurate representations of the complete cushions within the context of the cardiac outflow tract remodelling during embryogenesis. The process of leaflet separation requires formation of endothelial infolding within the cushion. Fernández *et al.* reported fusion of the NC and RC (R-N BAV) as the underlying mechanism for BAV in *Nos3*<sup>-/-</sup> mice (Fernández *et al.*, 2009). However, the absence of a strand of opposed endothelial cells that runs from the lumen to the sinus wall in the parietal cushion shows that the developmental background of the R-N BAV is not the result of a fusion process between two OFT cushions, but rather the result of an incomplete or absent separation process of the RC and NC leaflets from the parietal cushion during early valve development. We therefore found no indications of endothelial opposition that could support the theory of direct fusion. Recently Eley and co-workers/colleagues links the formation of BAV without a raphe to deficiencies in arterial valve cells from *Mef2c-AHF-Cre*<sup>+</sup>; *Tnnt2-Cre*<sup>+</sup> progenitors (Eley *et al.*, 2018). Interestingly changes in *NKX2.5*<sup>+</sup>/*TM*<sup>-</sup> SHF cell distribution is also observed in the *Nos3*<sup>-/-</sup> model emphasizing the importance of correct cell lineage distributions during valve formation. Moreover the cellular dynamics of *NKX2.5*<sup>+</sup>/*TM*<sup>-</sup> SHF population during OFT development observed in this study suggest that these cells do not originate from the myocardial wall as proposed by Mifflin *et al.* (Mifflin *et al.*, 2018) but rather migrate from the extra-cardiac pool of SHF cells into the OFT cushions and in agreement with Eley *et al.* (Eley *et al.*, 2018). However, the 3D reconstructions developed in our study do not indicate the formation of a detached/isolated developing intercalated cushions as the transitional zone did not develop into the NC or NF leaflets of the aortic and pulmonary valve. The transitional zones did not experience cushion swelling by cellularization as observed in the parietal and septal cushions but remained a thin region of cardiac jelly connecting the parietal and septal cushions during development. The development of the NC and NF from the septal and parietal cushions is further supported by the observations of the *NKX2.5*<sup>+</sup>/*TM*<sup>-</sup> SHF cells as a distinct group within the parietal and septal cushion which eventually develop into the NC and NF leaflets of the aortic and pulmonary valve development, respectively.

The asymmetric contribution of the NKX2.5<sup>+</sup>/TM<sup>+</sup> population to the aortic and pulmonary poles of the OFT has been described as the pulmonary push concept (Scherptong *et al.*, 2012). The greater number of contributing SHF cells to the pulmonary pole of the outflow tract in relation to that of the aortic pole might explain the susceptibility of *Nos3*<sup>-/-</sup> embryo to develop BAV unlike bicuspid pulmonary valve. The difference in cellular distribution within the pulmonary valve could possibly not reflect that of the aortic valve and could therefore be affected differently by the *Nos3* mutation. This subtle difference in cell lineage distribution might underlie the rarity of a bicuspid pulmonary valve in both mice and human.

Our observations of cushion invagination for valve formation has also been reported in the vertebrate zebrafish model suggesting a conserved mechanism for leaflet separation (Scherz *et al.*, 2008). Whether the process of leaflet separation is the result of active endothelial invasion or a result of passive geometric rearrangement, e.g. by outgrowth of the valvular leaflets, is yet to be determined.

NOS3 is a key mediator in the production of nitric oxide (NO) in endothelial cells and plays a role in regulating vascular tone through the L-arginine-NO pathway (Radomski and Moncada, 1993). Disruptions in the endothelial NO pathway have been associated with BAV in humans (Kotlarczyk *et al.*, 2016). However, the role of NO in outflow tract formation has not been studied in great detail. Signalling pathway analysis in *Nos3*<sup>-/-</sup> mice identified abnormal EMT as a cause for BAV (Fernández *et al.*, 2009; Liu *et al.*, 2013). However, these studies did not perform lineage tracing experiments and primarily relied on indirect measurements of EMT. We used the *Tie2Cre;mTmG* mice to genetically label the endothelial derived cells and showed that the endocardial contribution to the developing leaflets was not affected in *Nos3*<sup>-/-</sup> animals. Interestingly, the *Nos3* mutation did impact cell lineage distribution of neural crest and SHF cells among the leaflets of the aortic valve. This suggests that NOS3 might have an active role in guiding cell migration during development. Both SHF and neural crest cells migrate over the aortic and pulmonary arteries, in close proximity to endothelial cells. There have been reports that interactions between endothelial derived cells and neural crest cell lineages are required for correct leaflet development (Wu *et al.*, 2011).

Neural crest cells have been reported to be essential for correct positioning of the developing outflow cushions and patterning of the arterial valve leaflets (Phillips *et al.*, 2013). More recently Aghajanian *et al.* (Aghajanian *et al.*, 2017) showed that endothelial pdgfrA is an important factor for coordinating neural crest cell migration. The importance of correct lineage distributions of SHF, endothelial and neural crest cells in BAV has also been

suggested by other researchers (Jain *et al.*, 2011). The findings presented here support the notion that misregulation of these cell lineages can result in BAV in mice.

The angular differences in the aortic and pulmonary valve plane between wild type, *Nos3*<sup>-/-</sup> TAV and BAV *Nos3*<sup>-/-</sup> mutants as a result of lineage defects are likely to alter normal flow patterns. Hemodynamic aberrations have been widely supported to contribute to the aortopathy observed in many cases of BAV (Piatti *et al.*, 2017).

To examine the exact molecular pathways responsible for the signalling role of *Nos3* influencing neural crest and SHF distribution in outflow tract development further research is required. Interestingly, the advent of RNA-sequencing can shed light on the molecular mechanisms involved in cellular communication among early cell lineages.

## 5. Conclusion

During OFT development the parietal endocardial cushion gives rise to the RC and NC leaflets of the aortic valve as well as to the RF leaflet of the pulmonary valve. The septal cushion gives rise to the LC leaflet of the aortic valve as well as the LF and NF leaflets of the pulmonary valve. This asymmetric leaflet formation leads to non-uniform cell lineage distributions in the aortic valve. The non-coronary aortic leaflet is primarily populated by NKX2.5<sup>+</sup>/TM<sup>+</sup> SHF derived cells, whereas neural crest derived cells primarily populate the RC and LC aortic leaflets. Endothelial derived cell populations contribute to each leaflet equally. However, *Nos3*<sup>-/-</sup> embryos develop BAV due to defects in endothelial linked separation of the parietal cushion into the NC and RC aortic leaflet accompanied by a different pattern of disposition of embryonic cell lineages. All *Nos3*<sup>-/-</sup> embryos show increased contributions of SHF cells to the NC and LC leaflets, while a reduction of neural crest cells is observed in the RC leaflet. Moreover, embryonic lineage defects involved in valve formation results in morphometric changes of the outflow tract leading to aberrant positioning of the aortic and pulmonary valve in both tricuspid and bicuspid *Nos3*<sup>-/-</sup> embryos, albeit it is more pronounced in the latter. These valve alignment anomalies are most probably the result of aberrations in neural crest derived AP-septum formation affected in *Nos3*<sup>-/-</sup> embryos. These findings suggest that differences in early neural crest and SHF lineage distributions, as seen in BAV, are not limited solely to valve formation but impact complete cardiac outflow tract development.



### **Competing interests**

No competing interests declared

### **Funding**

Funding and salary support was provided by The Dutch Heart foundation (Projectcode: 31190BAV).

## References

- Aghajanian, H. *et al.* (2017) 'Pdgfr $\alpha$  functions in endothelial-derived cells to regulate neural crest cells and development of the great arteries', *Disease Models & Mechanisms*, p. dmm.029710. doi: 10.1242/dmm.029710.
- Anderson, R. H. *et al.* (2003) 'Development of the heart: (3) formation of the ventricular outflow tracts, arterial valves, and intrapericardial arterial trunks', *Heart*, 89(9), pp. 1110–1118.
- Baldwin, H. S., Lloyd, T. R. and Solursh, M. (1994) 'Hyaluronate degradation affects ventricular function of the early postlooped embryonic rat heart in situ', *Circulation Research*, 74(2), pp. 244–252. doi: 10.1161/01.RES.74.2.244.
- Biben, C. *et al.* (2000) 'Cardiac septal and valvular dysmorphogenesis in mice heterozygous for mutations in the homeobox gene Nkx2-5', *Circ Res*, 87(10), pp. 888–895.
- Camenisch, T. D. *et al.* (2000) 'Disruption of hyaluronan synthase-2 abrogates normal cardiac morphogenesis and hyaluronan-mediated transformation of epithelium to mesenchyme', *Journal of Clinical Investigation*, 106(3), pp. 349–360. doi: 10.1172/JCI10272.
- Eisenberg, L. M. and Markwald, R. R. (1995) 'Molecular regulation of atrioventricular valvuloseptal morphogenesis', *Circulation Research*, pp. 1–6. doi: 10.1161/01.RES.77.1.1.
- Eley, L. *et al.* (2018) 'A novel source of arterial valve cells linked to bicuspid aortic valve without raphe in mice', *eLIFE*, 7(e34110), pp. 1–27. doi: 10.7554/eLife.34110 .
- Fernández, B. *et al.* (2009) 'Bicuspid Aortic Valves With Different Spatial Orientations of the Leaflets Are Distinct Etiological Entities', *Journal of the American College of Cardiology*, 54(24), pp. 2312–2318. doi: 10.1016/j.jacc.2009.07.044.
- Gittenberger-de Groot, A. C. *et al.* (2012) 'The arterial and cardiac epicardium in development, disease and repair', *Differentiation*, pp. 41–53. doi: 10.1016/j.diff.2012.05.002.
- Gittenberger-De Groot, A. C. *et al.* (2005) 'Basics of cardiac development for the understanding of congenital heart malformations', *Pediatric Research*, pp. 169–176. doi: 10.1203/01.PDR.0000148710.69159.61.
- Gundersen, H. J. *et al.* (1988) 'Some new, simple and efficient stereological methods and their use in pathological research and diagnosis.', *APMIS: acta pathologica, microbiologica, et immunologica Scandinavica*, 96(5), pp. 379–94. doi: 10.1111/j.1699-0463.1988.tb05320.x.

- Hoffman, J. I. . and Kaplan, S. (2002) 'The incidence of congenital heart disease', *Journal of the American College of Cardiology*, 39(12), pp. 1890–1900. doi: 10.1016/S0735-1097(02)01886-7.
- Jain, R. *et al.* (2011) 'Cardiac neural crest orchestrates remodeling and functional maturation of mouse semilunar valves', *J Clin Invest*, 121(1), pp. 422–430. doi: 10.1172/jci44244.
- Jiang, X. *et al.* (2000) 'Fate of the mammalian cardiac neural crest.', *Development*, 127(8), pp. 1607–1616. doi: 10.1038/ncb3294.
- Kirby, M. L., Gale, T. F. and Stewart, D. E. (1983) 'Neural crest cells contribute to normal aorticopulmonary septation.', *Science (New York, N.Y.)*, 220(4601), pp. 1059–61. doi: 10.1126/science.6844926.
- Kisanuki, Y. Y. *et al.* (2001) 'Tie2-Cre transgenic mice: a new model for endothelial cell-lineage analysis in vivo', *Dev Biol*, 230(2), pp. 230–242. doi: 10.1006/dbio.2000.0106.
- Kotlarczyk, M. P. *et al.* (2016) 'Regional Disruptions in Endothelial Nitric Oxide Pathway Associated With Bicuspid Aortic Valve', *Ann Thorac Surg*. doi: 10.1016/j.athoracsur.2016.04.001.
- Kramer, T. C. (1942) 'The partitioning of the truncus and conus and the formation of the membranous portion of the interventricular septum in the human heart', *American Journal of Anatomy*. Wiley-Blackwell, 71(3), pp. 343–370. doi: 10.1002/aja.1000710303.
- de la Cruz, M. V *et al.* (1977) 'Experimental study of the development of the truncus and the conus in the chick embryo', *Journal of Anatomy*, 123(3), pp. 661–686.
- Laforest, B. and Nemer, M. (2011) 'GATA5 interacts with GATA4 and GATA6 in outflow tract development', *Dev Biol*, 358(2), pp. 368–378. doi: 10.1016/j.ydbio.2011.07.037.
- Lee, T. C. *et al.* (2000) 'Abnormal aortic valve development in mice lacking endothelial nitric oxide synthase', *Circulation*, 101(20), pp. 2345–2348. doi: 10.1161/01.CIR.101.20.2345.
- Lin, C.J. *et al.* (2012) 'Partitioning the heart: mechanisms of cardiac septation and valve development', *Development*, 139(18), pp. 3277–3299. doi: 10.1242/dev.063495.
- Liu, Y. *et al.* (2013) 'Nitric oxide synthase-3 promotes embryonic development of atrioventricular valves.', *PloS one*, 8(10), p. e77611. doi: 10.1371/journal.pone.0077611.
- Macatee, T. L. (2003) 'Ablation of specific expression domains reveals discrete functions of ectoderm- and endoderm-derived FGF8 during cardiovascular and pharyngeal

- development', *Development*, 130(25), pp. 6361–6374. doi: 10.1242/dev.00850.
- Makki, N. and Capecchi, M. R. (2012) 'Cardiovascular defects in a mouse model of HOXA1 syndrome', *Hum Mol Genet*, 21(1), pp. 26–31. doi: 10.1093/hmg/ddr434.
- Manasek, F. J. (1968) 'Embryonic development of the heart. I. A light and electron microscopic study of myocardial development in the early chick embryo', *Journal of Morphology*, 125(3), pp. 329–365. doi: 10.1002/jmor.1051250306.
- Merkx, R. *et al.* (2017) 'Aortic Diameter Growth in CHildren With a Bicuspid Aortic Valve', *Am J Cardiol*, 120(1), pp. 131–136. doi: 10.1016/j.amjcard.2017.03.245.
- Mifflin, J. J. *et al.* (2018) 'Intercalated cushion cells within the cardiac outflow tract are derived from the myocardial troponin T type 2 (Tnnt2) Cre lineage', *Developmental Dynamics*, 247(8), pp. 1005–1017. doi: 10.1002/dvdy.24641.
- Mommersteeg, M. T. M. *et al.* (2015) 'Disrupted Slit-Robo signalling results in membranous ventricular septum defects and bicuspid aortic valves', *Cardiovascular Research*, 106(1), pp. 55–66. doi: 10.1093/cvr/cvv040.
- Nagy, A. (2000) 'Cre recombinase: The universal reagent for genome tailoring', *Genesis*, pp. 99–109.
- Odelin, G. *et al.* (2017) 'Krox20 defines a subpopulation of cardiac neural crest cells contributing to arterial valves and bicuspid aortic valve', *Development*. doi: 10.1242/dev.151944.
- Phillips, H. M. *et al.* (2013) 'Neural crest cells are required for correct positioning of the developing outflow cushions and pattern the arterial valve leaflets', *Cardiovascular Research*, 99(3), pp. 452–460. doi: 10.1093/cvr/cvt132.
- Piatti, F. *et al.* (2017) '4D flow analysis of BAV-Related fluid-dynamic alterations: Evidences of wall shear stress alterations in absence of clinically-relevant aortic anatomical remodeling', *Frontiers in Physiology*, 8(JUN). doi: 10.3389/fphys.2017.00441.
- Qayyum, S. R. *et al.* (2001) 'Septation and valvar formation in the outflow tract of the embryonic chick heart', *Anatomical Record*, 264(3), pp. 273–283. doi: 10.1002/ar.1162.
- Radomski, M. W. and Moncada, S. (1993) 'Regulation of vascular homeostasis by nitric oxide', *Thrombosis and Haemostasis*, pp. 36–41.
- Roberts, W. C. (1970) 'The congenitally bicuspid aortic valve. A study of 85 autopsy cases',

*The American Journal of Cardiology*, pp. 72–83. doi: 10.1016/0002-9149(70)90761-7.

Sauer, B. and Henderson, N. (1988) 'Site-specific DNA recombination in mammalian cells by the Cre recombinase of bacteriophage P1.', *Proceedings of the National Academy of Sciences*, 85(14), pp. 5166–5170. doi: 10.1073/pnas.85.14.5166.

Scherptong, R. W. *et al.* (2012) 'Morphogenesis of outflow tract rotation during cardiac development: the pulmonary push concept', *Dev Dyn*, 241(9), pp. 1413–1422. doi: 10.1002/dvdy.23833.

Scherz, P. J. *et al.* (2008) 'High-speed imaging of developing heart valves reveals interplay of morphogenesis and function', *Development*, 135(6), pp. 1179–1187. doi: 10.1242/dev.010694.

Schindelin, J. *et al.* (2012) 'Fiji: An open source platform for biological image analysis.', *Nature Methods*, 9(7), pp. 676–682. doi: 10.1038/nmeth.2019.Fiji.

Sievers, H.-H. *et al.* (2015) 'New insights in the association between bicuspid aortic valve phenotype, aortic configuration and valve haemodynamics', *European Journal of Cardio-Thoracic Surgery*. doi: 10.1093/ejcts/ezv087.

Sievers, H. H. and Schmidtke, C. (2007) 'A classification system for the bicuspid aortic valve from 304 surgical specimens', *J Thorac Cardiovasc Surg*, 133(5), pp. 1226–1233. doi: 10.1016/j.jtcvs.2007.01.039.

Subodh, V. and C., S. S. (2014) 'Aortic Dilatation in Patients with Bicuspid Aortic Valve', *New England Journal of Medicine*, 370(20), pp. 1920–1929. doi: 10.1056/NEJMra1207059.

Sugi, Y. *et al.* (2004) 'Bone morphogenetic protein-2 can mediate myocardial regulation of atrioventricular cushion mesenchymal cell formation in mice', *Developmental Biology*, 269(2), pp. 505–518. doi: 10.1016/j.ydbio.2004.01.045.

Theron, A. *et al.* (2015) 'Krox20 heterozygous mice: A model of aortic regurgitation associated with decreased expression of fibrillar collagen genes', *Arch Cardiovasc Dis*. doi: 10.1016/j.acvd.2015.10.002.

Thomas, P. S. *et al.* (2012) 'Deficient signaling via Alk2 (Acvr1) leads to bicuspid aortic valve development', *PLoS One*, 7(4), p. e35539. doi: 10.1371/journal.pone.0035539.

Verzi, M. P. *et al.* (2005) 'The right ventricle, outflow tract, and ventricular septum comprise a restricted expression domain within the secondary/anterior heart field', *Dev Biol*, 287(1), pp. 134–145. doi: 10.1016/j.ydbio.2005.08.041.

Waldo, K. *et al.* (1998) 'Cardiac neural crest cells provide new insight into septation of the cardiac outflow tract: aortic sac to ventricular septal closure', *Dev Biol*, 196(2), pp. 129–144. doi: 10.1006/dbio.1998.8860.

Waldo, K. L. *et al.* (2001) 'Conotruncal myocardium arises from a secondary heart field', *Development*, 128(16), pp. 3179–3188.

Ward, C. (2000) 'Clinical significance of the bicuspid aortic valve.', *Heart (British Cardiac Society)*, 83(1), pp. 81–5. doi: 10.1136/HEART.83.1.81.

Wu, B. *et al.* (2011) 'Nfatc1 coordinates valve endocardial cell lineage development required for heart valve formation', *Circulation Research*, 109(2), pp. 183–192. doi: 10.1161/CIRCRESAHA.111.245035.

Zaffran, S. and Kelly, R. G. (2012) 'New developments in the second heart field', *Differentiation*, 84(1), pp. 17–24. doi: 10.1016/j.diff.2012.03.003.

## Figures

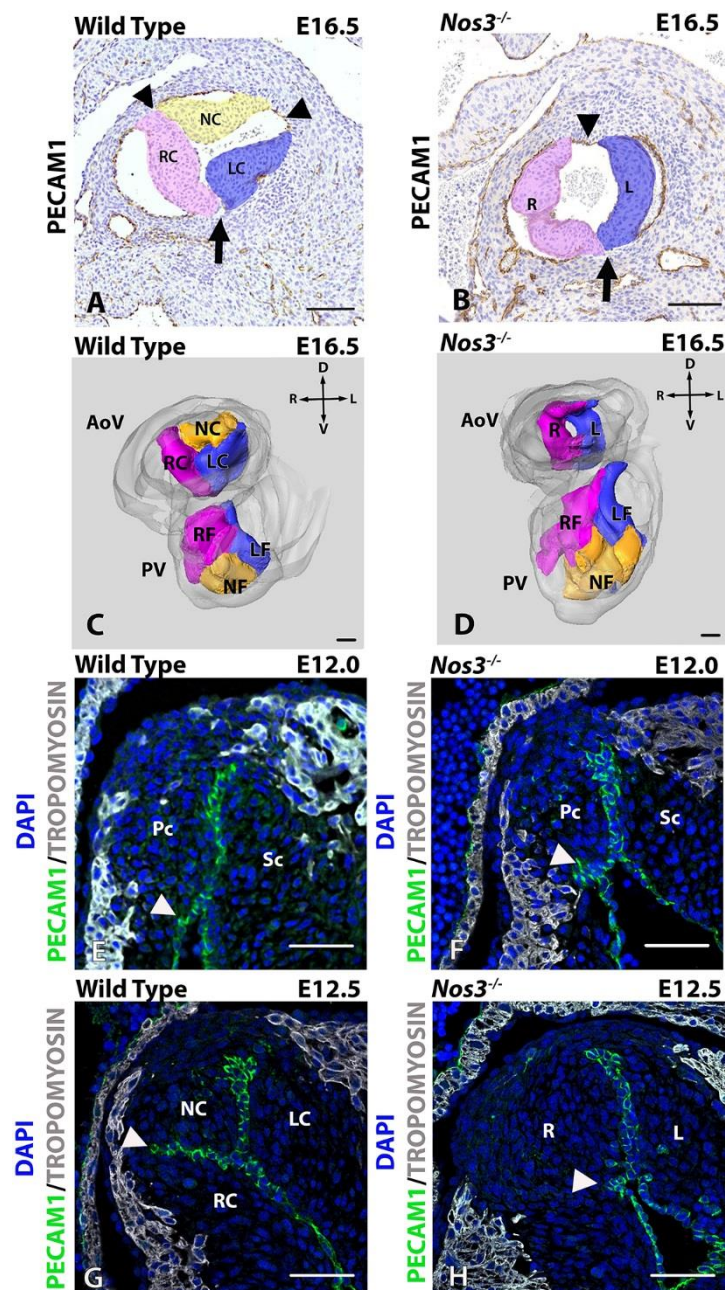

Figure 1.

### **Failure of cushion separation results in bicuspid aortic valves**

A, B: Anti-PECAM1 labelled histological antibody staining depicting the left coronary leaflet (LC), right coronary leaflet (RC) and non-coronary leaflet (NC) in E16.5 tricuspid aortic valve (TAV) wild type (A) and left (L) right (R) leaflets in bicuspid aortic valve (BAV) *Nos3*<sup>-/-</sup> mice (B). Position of the facing L-R commissure was similar between wild type and *Nos3*<sup>-/-</sup> mice (indicated by arrows in A and B). Bicuspid *Nos3*<sup>-/-</sup> developed a commissure opposite to the facing commissure whereas tricuspid wild type mice developed three commissures equilateral between the leaflets. (arrowheads in A and B). C, D: 3D reconstruction of the

aortic and pulmonary valves (AoV and PV respectively) showing individual and connected leaflets within the aortic root in wild type (C) and *Nos3*<sup>-/-</sup> (D) mice. Note that in *Nos3*<sup>-/-</sup> mice leaflets of the PV developed normally. E-H: Anti-PECAM1 (green), anti-TROPOMYOSIN (grey) immunofluorescent stained paraffin sections of the aortic valve at E12.0 wild-type (E) and *Nos3*<sup>-/-</sup> (F) embryos show the parietal (Pc) and septal cushion (Sc). Wild type embryos develop tricuspid leaflets as a result of separation of the parietal cushion into the right- and non-coronary leaflets at E12.5 (G). Failure of separation of the parietal cushion resulted in the formation of bicuspid aortic valves (H). Location of endothelial infolding is indicated by white arrowheads. The endothelial distribution within the leaflets showed no indication of leaflet fusion as the result of the merging of two individual leaflets, as no endothelial lined raphe is present in bicuspid *Nos3*<sup>-/-</sup> mice. Nuclei were stained with DAPI (blue). AoV: aortic valve, PV: pulmonary valve, Pc: Parietal cushion, Sc: Septal cushion, RC: right coronary, LC: left coronary, NC: non-coronary, RF: right facing, LF: left facing, NF: non-facing, R: right, L: left, V: Ventral, D: Dorsal. Scale bars: 50µm.



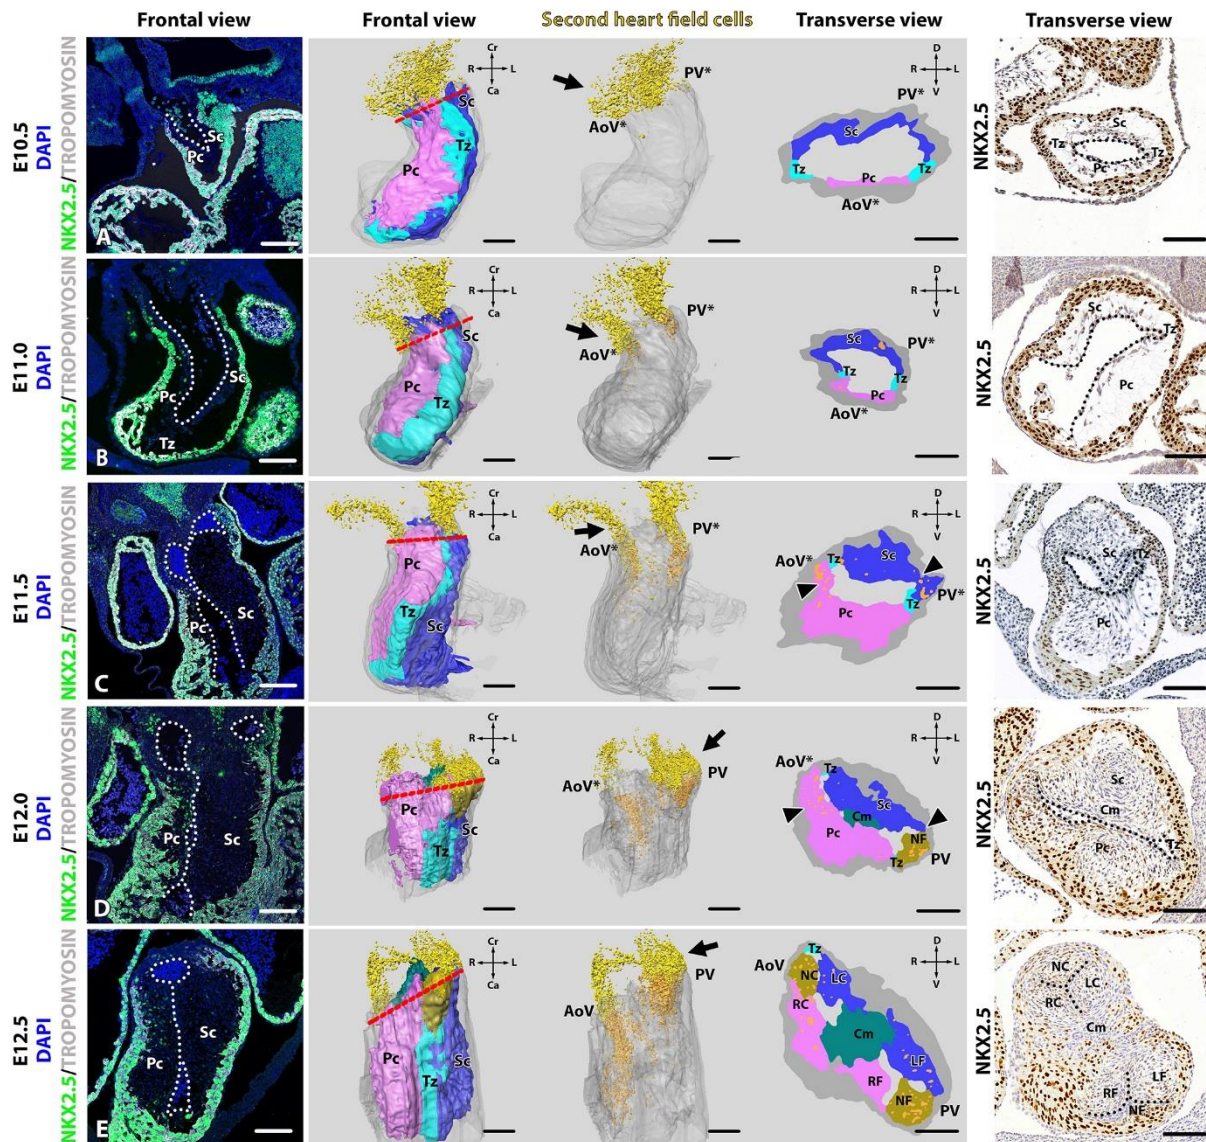

Figure 2.

***Aortic and pulmonary leaflets develop from the parietal and septal cushions***

First column depicts frontal fluorescent images of embryonic septal (Sc) and parietal cushions (Pc) within the cardiac outflow tract (OFT) of wild type embryos age E10.5-12.5 using anti-NKX2.5 (green), anti-TROPOMYOSIN (grey) and DAPI as a nuclear marker (blue). Column 2 and 4 show frontal view on and transverse sections through 3D reconstructions of the OFT that can be divided into the myocardial outer wall (grey) and the Pc and Sc (purple and dark blue, respectively). The parietal and septal cushions were connected by a thin transitional zone (Tz) of cardiac jelly sparsely populated by cells (cyan). Column 3 is similar to the reconstructions in column 2 but without the reconstructed Pc, Tz and Sc to demonstrate the intracardiac SHF cells. The 5th column depicts an immunostaining of NKX2.5 at the location of the transverse plane (red dotted line). A: NKX2.5<sup>+</sup>/TROPOMYOSIN<sup>-</sup> second heart field (SHF) cells (yellow) were located at the proximal outflow tract outside the heart tube at E10.5 (Arrows). B: NKX2.5<sup>+</sup>/TROPOMYOSIN<sup>-</sup> SHF cells that were positioned in the septal and parietal cushions

at opposing poles of the OFT at E11.0 have been reconstructed in orange. C: Due to OFT rotation the NKX2.5<sup>+</sup> cells (orange) could be found within the parietal and septal cushions where the non-facing (NF) and non-coronary (NC) leaflets would form (arrow heads). D: At E12.0, condensed mesenchyme (Cm) (dark green) indicated the formation of the AP-septum in the transverse view. At the pulmonary orifice, the NF leaflet dissociated from the septal cushion whilst the NC leaflet remains connected (arrow heads). E: Complete separation of valve leaflets was established at E12.5 at which the NC leaflet dissociated from the parietal cushion. AoV\*: future aortic valve, PV\*: future pulmonary valve, AoV: aortic valve, PV: pulmonary valve, Pc: Parietal cushion, Sc: Septal cushion, Tz: Transitional zone, Cm: Condensed mesenchyme, RC: right coronary leaflet, LC: left coronary leaflet, NC: non-coronary leaflet, RF: right facing leaflet, LF: left facing leaflet, NF: non-facing leaflet D: dorsal, V: ventral, Cr: Cranial, Ca: Caudal. White and black dotted line indicate endothelial lining. Scale bar: 100µm

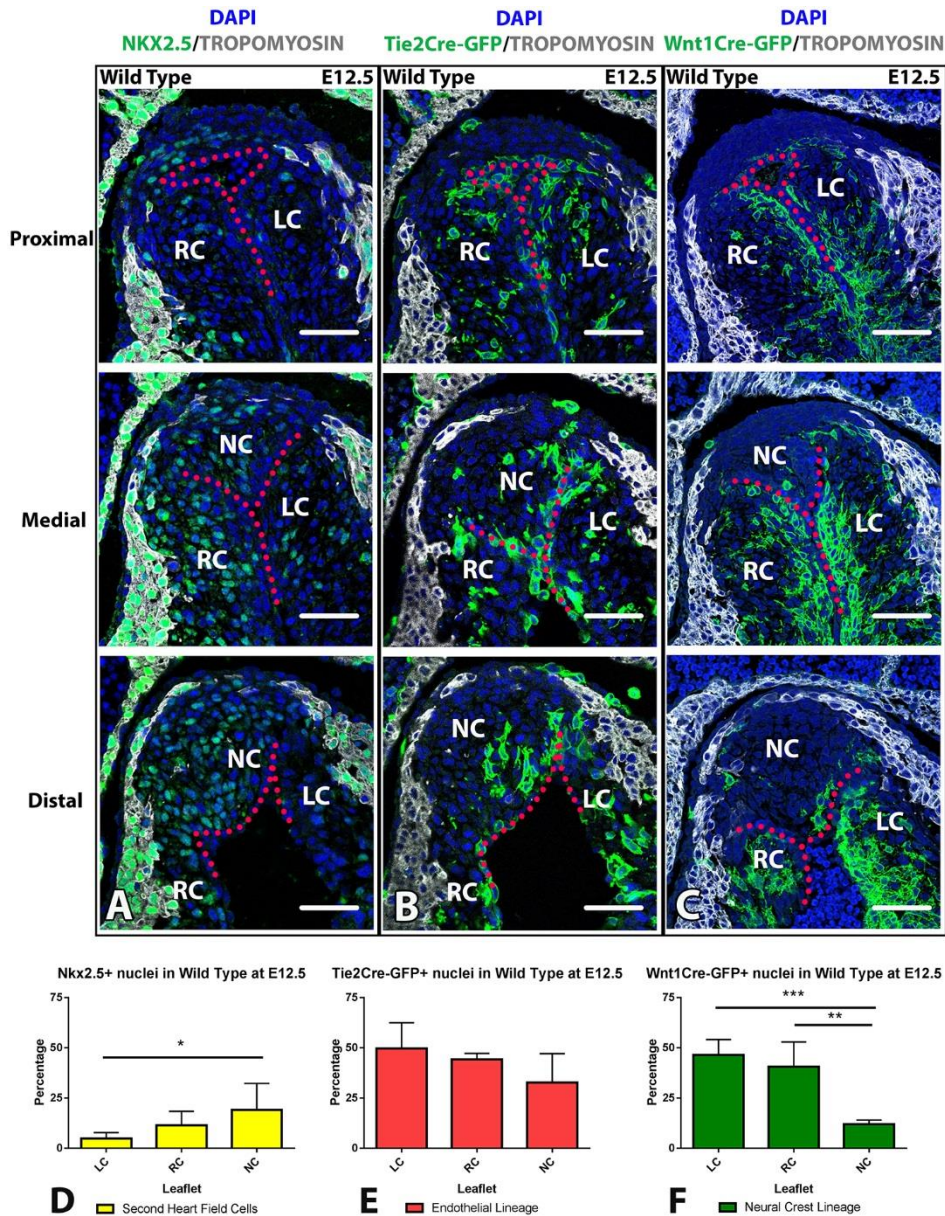

Figure 3.

***Aortic valve leaflets harbour unique cell lineage distributions in wild type embryos at E12.5.***

A: Top to bottom pictures represent NKX2.5<sup>+</sup>/TROPOMYOSIN<sup>-</sup> second heart field (SHF) (green) cell distribution from proximal to distal regions within the aortic valve. Note that the SHF populations within the valve are localized at medial and distal positions. B: Depiction of *Tie2Cre-GFP*<sup>+</sup> endothelial lineage (green) contribution throughout the aortic valve. C: *Wnt1Cre-GFP*<sup>+</sup> neural crest lineage (green) cell contribution to the aortic valve is primarily organized in the right and left coronary (RC and LC) leaflets but not the non-coronary (NC) leaflet. D: Cell lineage leaflet analysis of NKX2.5<sup>+</sup>/TROPOMYOSIN<sup>-</sup> SHF showed significantly more contribution to the NC leaflet than to the LC leaflet of the aortic valve in wild type embryos (n = 8) at E12.5 ( $P < 0.05$ ). E: *Tie2Cre-GFP*<sup>+</sup> endothelial derived cells showed no bias to which leaflet is populated and distributed equally among individual leaflets in wild type embryos (n = 5) at E12.5. F: In wild type embryos, *Wnt1Cre-GFP*<sup>+</sup> neural crest derived

cells contributed more to the RC ( $P < 0.01$ ) and LC ( $P < 0.001$ ) leaflets but specifically less to the NC leaflet at E12.5 ( $n = 4$ ). Data are mean  $\pm$  s.d. \*, \*\* and \*\*\* indicate  $P < 0.05$ ,  $P < 0.01$ , and  $P < 0.001$  respectively, determined by one-way ANOVA. colour scheme: DAPI (blue), TROPOMYOSIN (grey), Lineage markers (green), Endothelial lining represented with red dotted line. RC: right coronary leaflet, LC: left coronary leaflet, NC: non-coronary leaflet, Scale bar: 50 $\mu$ m

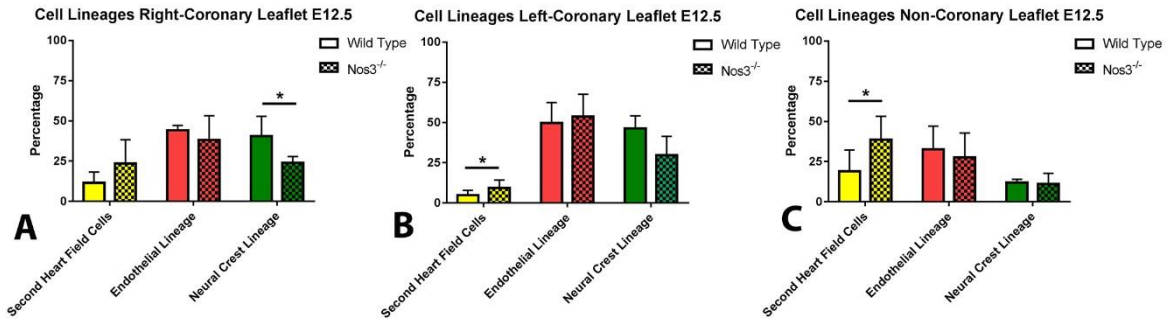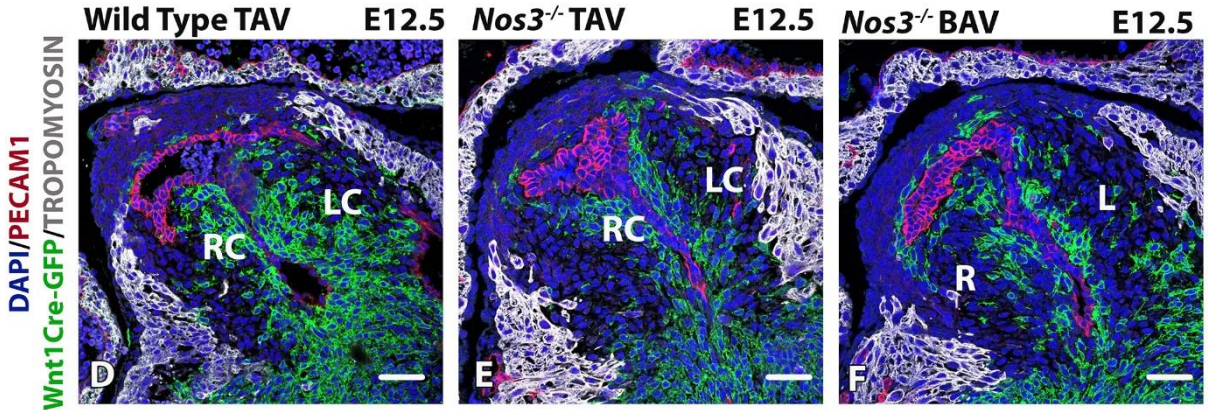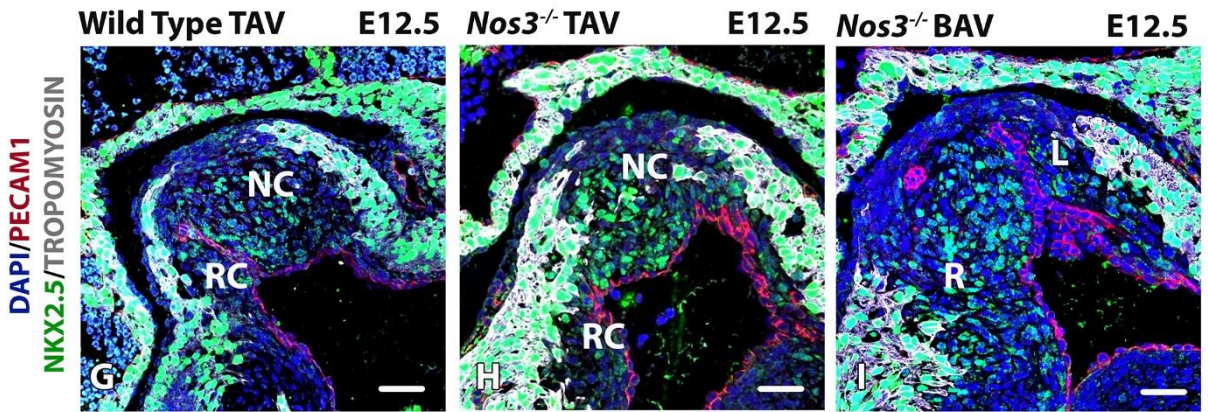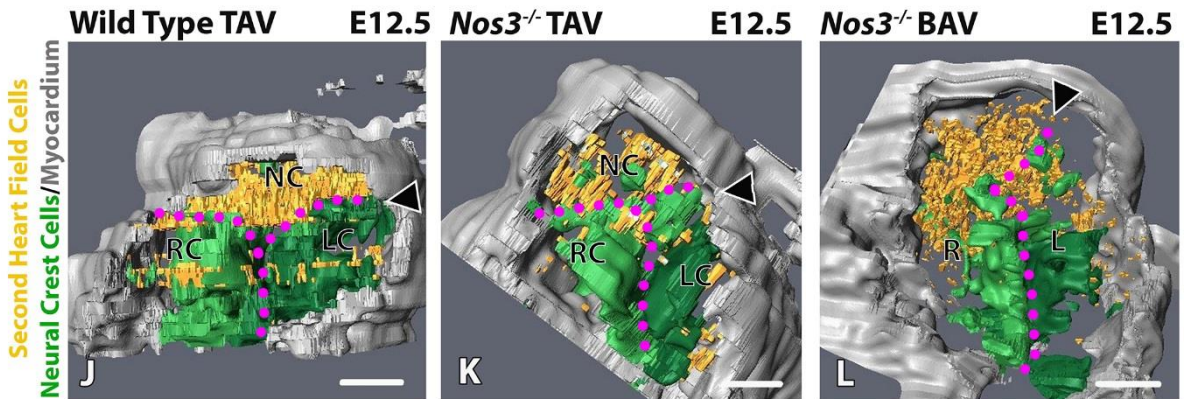

Figure 4.

**Aberrant neural crest and second heart field lineage distribution in *Nos3*<sup>-/-</sup> embryos**

A: Cell lineage analysis in *Nos3*<sup>-/-</sup> embryos showed significantly less neural crest derived cells contribute to the right coronary (RC) leaflet in *Nos3*<sup>-/-</sup> than wild type embryos at E12.5 ( $P < 0.05$ ). B: Increased contribution of NKX2.5<sup>+</sup>/TROPOMYOSIN<sup>-</sup> SHF cells were observed in the left coronary (LC) leaflet in *Nos3*<sup>-/-</sup> embryos as compared to age matched wild type embryos ( $P < 0.05$ ). C: The NC leaflet of *Nos3*<sup>-/-</sup> contains a significantly larger NKX2.5<sup>+</sup>/TROPOMYOSIN<sup>-</sup> SHF population than those found in wild type embryos at E12.5 ( $P < 0.05$ ). D-F: Immunofluorescent images of *Wnt1-Cre;mTmG* tricuspid aortic valve (TAV) wild type (D), *Nos3*<sup>-/-</sup> TAV (E), and bicuspid aortic valve (BAV) *Nos3*<sup>-/-</sup> (F) embryos at E12.5 showed diminished neural crest populations (green) in the leaflets of the aortic valve in *Nos3*<sup>-/-</sup> embryos. G-I: Immuno-fluorescent images of wild type TAV (G), *Nos3*<sup>-/-</sup> TAV (H), and *Nos3*<sup>-/-</sup> BAV (I), show increased NKX2.5<sup>+</sup>/TROPOMYOSIN<sup>-</sup> second heart field cells in the aortic leaflets of *Nos3*<sup>-/-</sup> embryos. Colour scheme: Anti-PECAM1 (red), anti-TROPOMYOSIN (grey), Lineage marker (green), nuclei were stained with DAPI (blue). J-L: 3D reconstructions showed that the NKX2.5<sup>+</sup>/TROPOMYOSIN<sup>-</sup> second heart field cells (orange) primarily localize in the NC leaflet in wild type TAV and *Nos3*<sup>-/-</sup> TAV whereas in *Nos3*<sup>-/-</sup> BAV the majority of SHF cells were located in the right (R) leaflet. BAV embryos developed the position of the left commissure more posterior than wild type TAV and *Nos3*<sup>-/-</sup> TAV (arrowheads). Data are mean  $\pm$  s. d. for  $n \geq 4$  mice per group. \* indicate  $P < 0.05$  determined by two tailed student T test. RC: right coronary leaflet, LC: left coronary leaflet, NC: non-coronary leaflet, Scale bar: 50 $\mu$ m

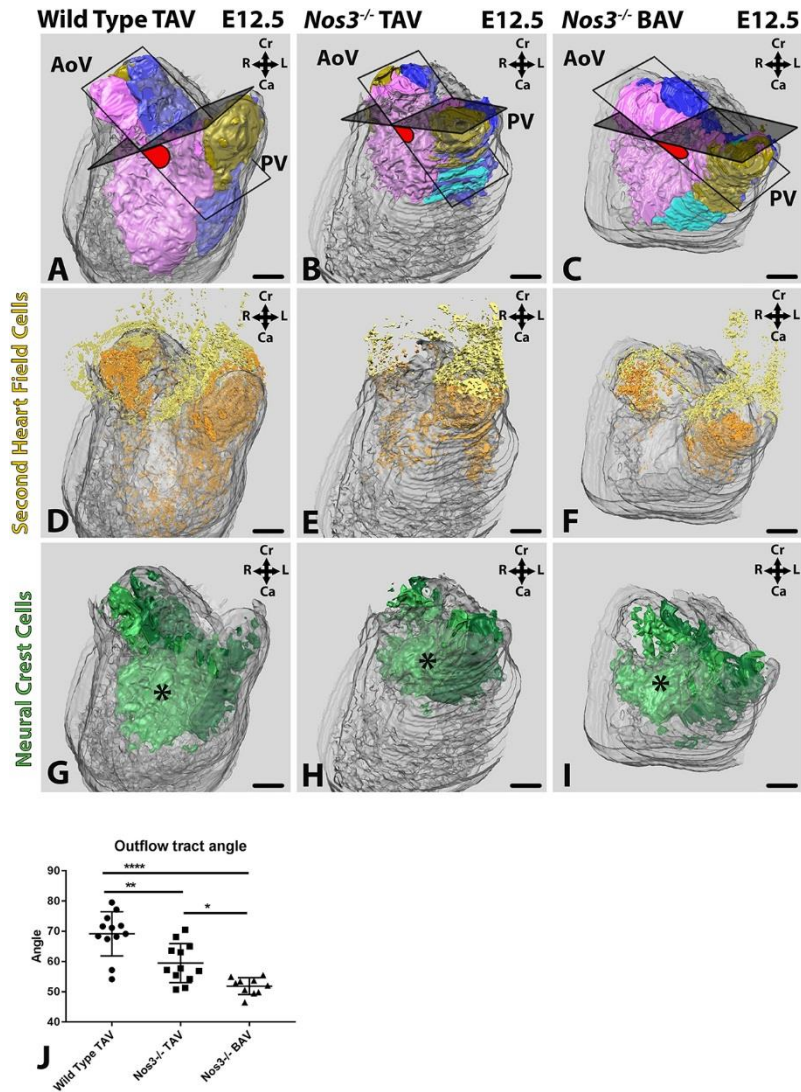

Figure 5.

***Nos3* deficiency results in morphological outflow tract defects in both tricuspid and bicuspid aortic valve mutants.**

A-I: 3D outflow tract reconstructions depicts myocardium (grey), non-coronary leaflet (gold), transitional region (cyan), parietal (purple), septal (blue) cushions of wild type TAV (A), *Nos3*<sup>-/-</sup> TAV (B), and *Nos3*<sup>-/-</sup> BAV (C) embryos at E12.5. Protractor (red) of aortic- and pulmonary valve commissure planes showed smaller angulation in *Nos3*<sup>-/-</sup> TAV and *Nos3*<sup>-/-</sup> BAV when compared to TAV wild type embryos. NKX2.5<sup>+</sup>/TROPOMYOSIN<sup>-</sup> second heart field (SHF) cells migrated from outside the cushions (yellow) into the cushions (orange) (D). Both tricuspid (E) and bicuspid (F) *Nos3*<sup>-/-</sup> mutants showed SHF cell populations restricted to the cushion tissue. G-I: In TAV wild type embryos (G) neural crest derived cells contributed to the formation of the AP septum in regions of condensed mesenchyme positioned centrally between the aortic and pulmonary orifices indicated by asterisk. AP septum development in *Nos3*<sup>-/-</sup> TAV (H) and *Nos3*<sup>-/-</sup> BAV (I) is located more proximal to the semilunar valves than in

wild type, affecting annulus formation and the position of the aortic and pulmonary valves. J. Morphometric measurements between aortic valve and pulmonary valve revealed significant differences between tricuspid wild type and *Nos3<sup>-/-</sup>* TAV ( $P = 0.0012$ ), as well as between wild type TAV and *Nos3<sup>-/-</sup>* BAV ( $P < 0.0001$ ). Moreover there were significant differences between *Nos3<sup>-/-</sup>* TAV and *Nos3<sup>-/-</sup>* BAV ( $P = 0.0159$ ). This indicates a strong relation between outflow tract development and leaflet formation where a small angle between aortic and pulmonary valve indices with BAV. Data are mean  $\pm$  s.d. \*, \*\* and \*\*\*\* indicate  $P < 0.05$ ,  $P < 0.01$  and  $P < 0.0001$  respectively determined by one-way ANOVA. AoV: aortic valve, PV: pulmonary valve, Ao: aorta, R: right, L: left, D: dorsal, V: ventral, Cr: cranial, Ca: caudal. Colour coding: Myocardium (transparent grey), parietal cushion (purple), Non-coronary leaflet (yellow), septal cushion (light blue), pulmonary artery (dark blue). Nuclear DAPI staining: Blue, Scale bar: 100 $\mu$ m.



## Supplemental Material

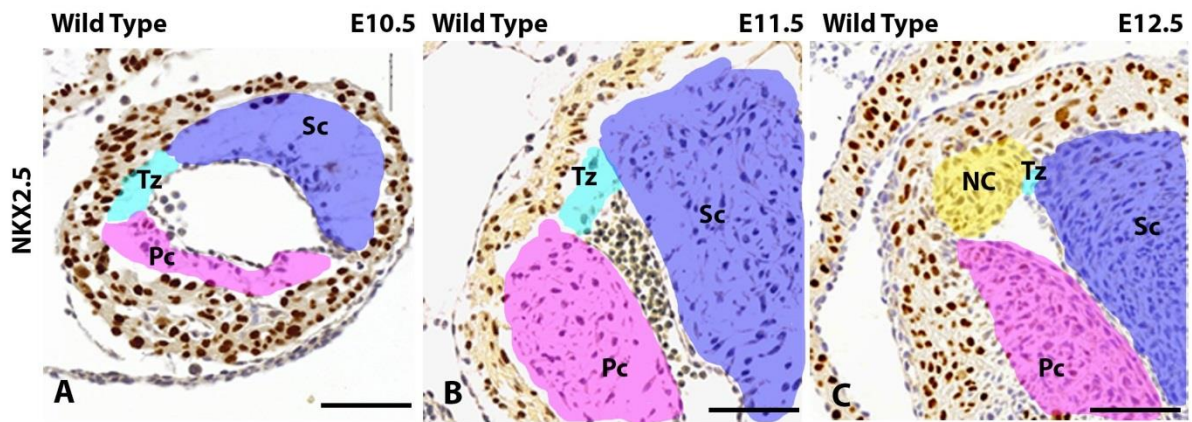

Figure S1.

### ***Endocardial cushion development in wild type embryos***

A: At E10,5 endocardial cells have migrated into the septal cushion (Sc) (blue) and parietal cushion (Pc) (purple). These cushions remained connected by a transitional zone (Tz) (cyan), a thin region of cardiac jelly sparsely populated by cells. B: The Pc and Sc enlarged at E11.5 whereas the transitional zone remained sparsely populated. C: At E12.5 the transitional zone was positioned at the site of the commissure between the left coronary leaflet (LC) and non-coronary leaflet (NC). The NC (yellow) was separated from the Pc. Myocardial cells were NKX2.5 positive (brown) . Scale bar is 50µm.

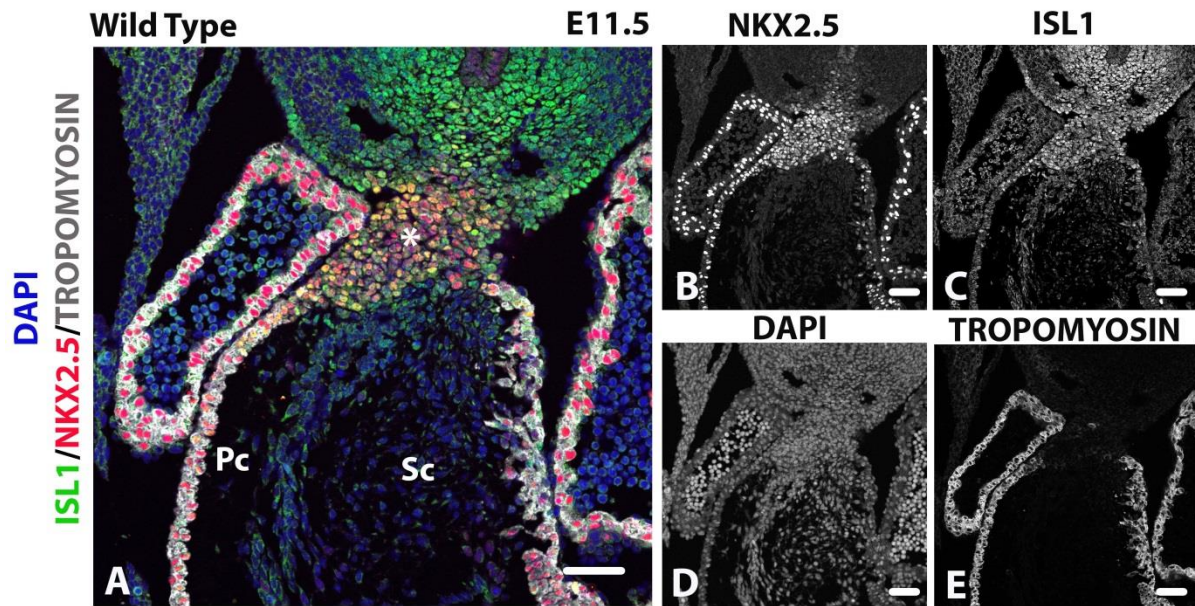

Figure S2.

***NKX2.5<sup>+</sup>/TROPOMYOSIN* cells represents *ISL1<sup>+</sup>* second heart field cells contributing to the outflow tract.**

A-E: Immuno-fluorescent images showing co-expression of NKX2.5 and ISL1 in second heart field cells contributing to the formation of the outflow tract in E11.5 wild type embryos. Colour scheme: Anti-NKX2.5 (red), Anti-ISL1 (green), Anti-TROPOMYOSIN (grey), DAPI was used as a nuclear staining (blue). Scale bar: 50µm.

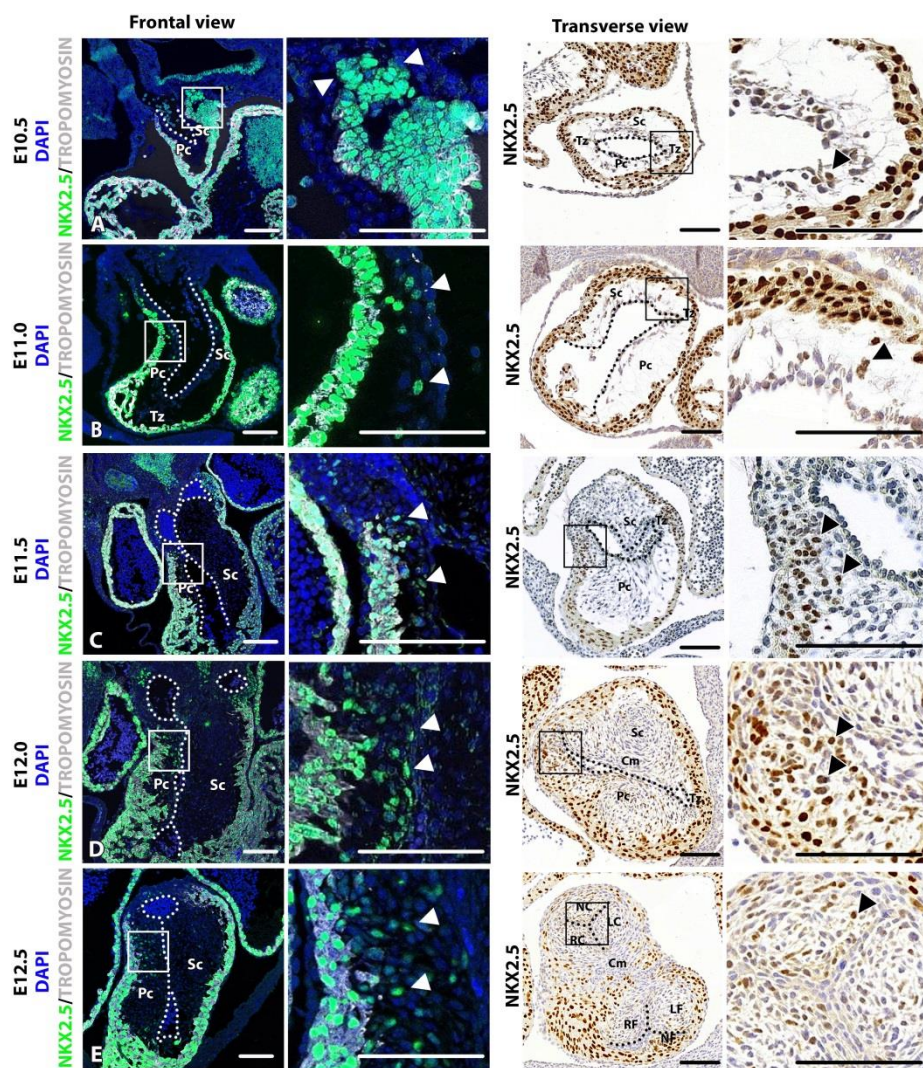

Figure S3.

***Direct NKX2.5<sup>+</sup>/TROPOMYOSIN<sup>-</sup> second heart field cells contribution to the aortic valve***

A-E: NKX2.5<sup>+</sup>/TROPOMYOSIN<sup>-</sup> second heart field cells migrate into the cushions during development and contribute directly to the formation of the aortic leaflets. Colour scheme immunofluorescent images: Anti-NKX2.5 (green), Anti-TROPOMYOSIN (grey), Nuclei were stained with DAPI (blue). Colour scheme immunohistological images: Anti-NKX2.5 (brown), nuclei are counterstained using hematoxine eosine (HE). Scale bar: 50µm.

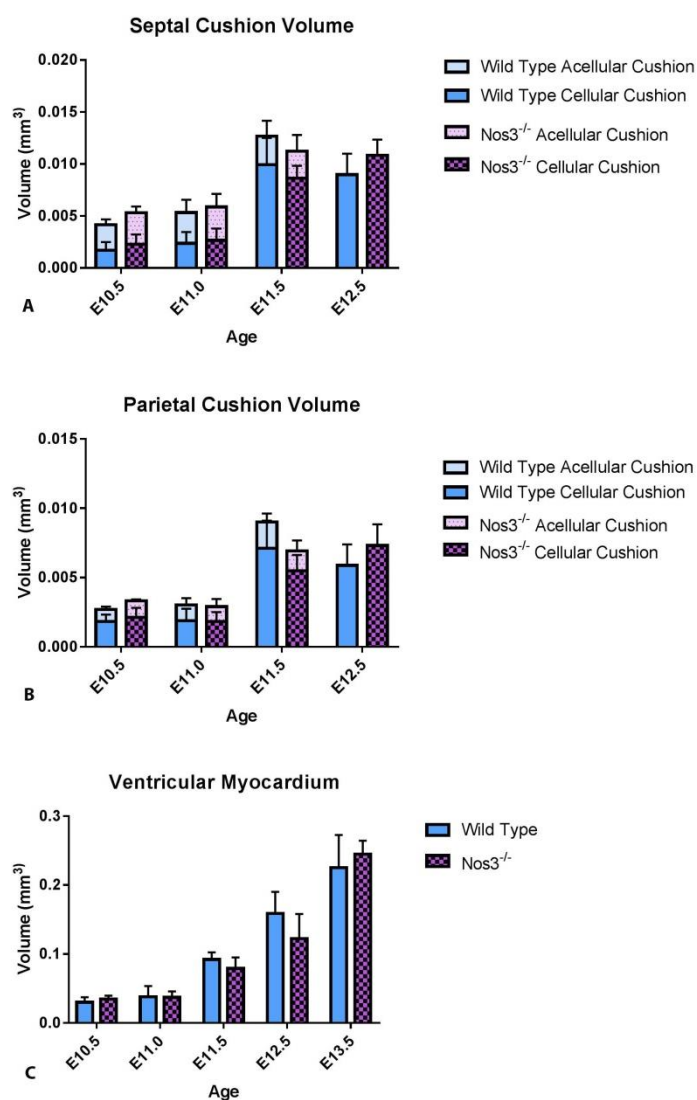

Figure S4.

***Cushion volume is not affected in  $Nos3^{-/-}$  embryos during stages E10.5 to E12.5 of embryonic development***

A,B: Total cushion volume analysis indicated no differences ( $p > 0.05$ ) in total volume of septal (A) and parietal (B) cushions between wild type and  $Nos3^{-/-}$  embryos during development. Close examination also showed no difference in the cellular fractions of the septal and parietal cushions nor the acellular fractions between wild type and  $Nos3^{-/-}$  embryos at stages E10.5 to E12.5. C: Myocardial volume analysis established that  $Nos3^{-/-}$  embryos have an equal heart size compared to wild type embryos. Data are mean  $\pm$  s.d. Analysis was performed using two tailed student T test.

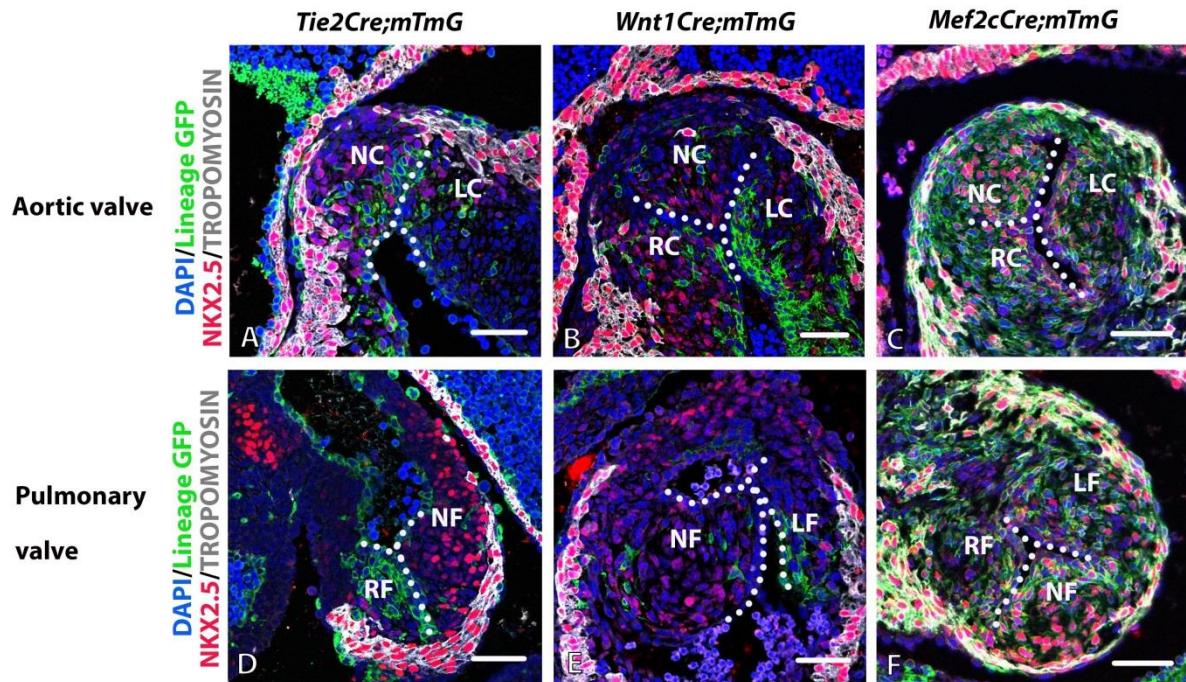

Figure S5.

**Aortic leaflets have unique cell lineage distributions**

A-F: Detection of NKX2.5 positive cells negative for TROPOMYOSIN indicated direct contribution of second heart field cells to the non-coronary aortic and non-facing pulmonary leaflet in wild type embryos at E12.5. NKX2.5<sup>+</sup>/TROPOMYOSIN<sup>-</sup> cells show no overlap with the *Tie2Cre* endothelial (A,D; green) or *Wnt1Cre* neural crest (B,E; green) lineages but do overlap with *Mef2cCre* second heart field derived cells (C,F; green). Dots indicate endothelial lining(white). Color scheme: TROPOMYOSIN (grey), DAPI (blue), NKX2.5 (red), Lineage-Cre derived GFP (green). Scale bar: 50µm

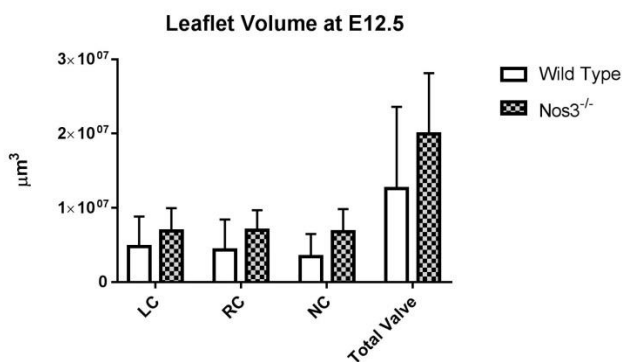

Figure S6.

**Total leaflet volume is not affected in *Nos3*<sup>-/-</sup> embryos.**

Volume analysis of aortic leaflets in the aortic valve shows equal volume in wild type and *Nos3*<sup>-/-</sup> embryos. LC: left coronary leaflet, RC: right coronary leaflet, NC: non-coronary leaflet. Data are mean ± s.d. Analysis was performed using two tailed student T test.

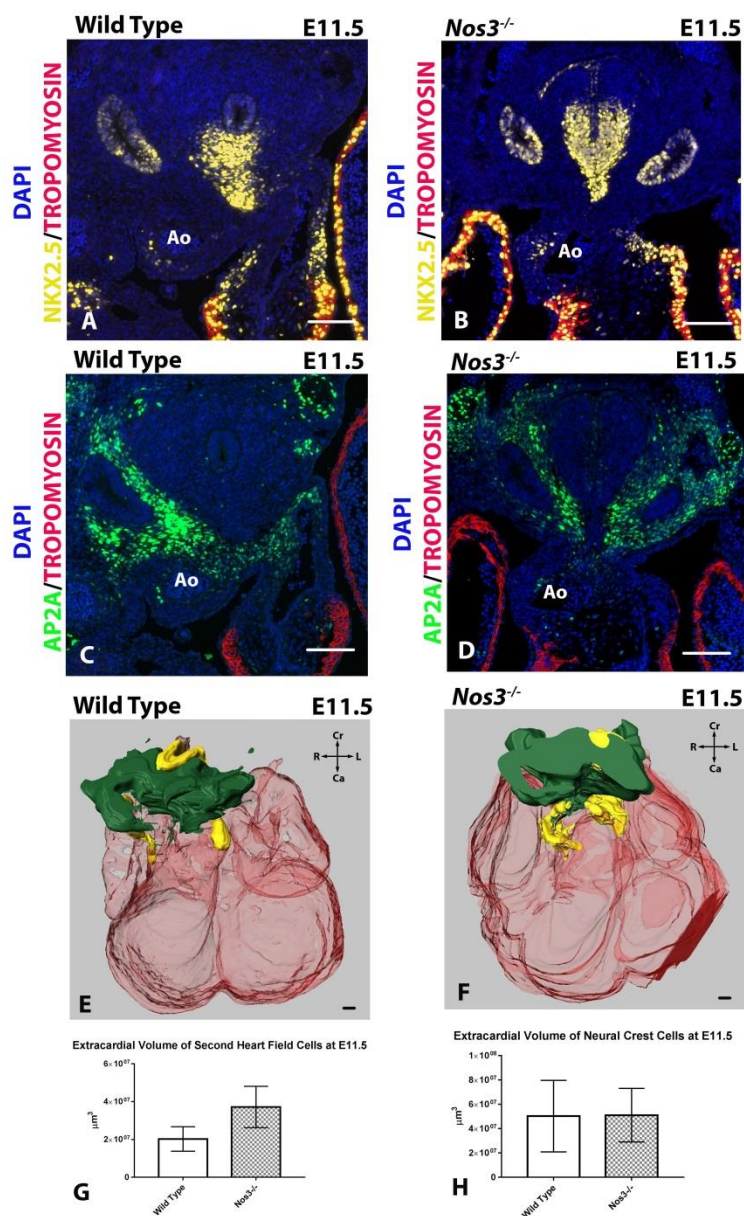

Figure S7.

**Extracardial neural crest and second heart field population are not affected by *Nos3* mutation.**

A:D immuno-fluorescent images of extracardial NKX2.5<sup>+</sup>/TROPOMYOSIN<sup>-</sup> second heart field (SHF) (yellow) and AP2A neural crest cell (green) populations in wild type (A,C) and *Nos3*<sup>-/-</sup> (B,D) embryos at stage E11.5 when migration into the cushions has been initiated. E-F: 3D reconstruction of extracardial neural crest (green) and SHF populations (yellow) show similar localization in both wild type and *Nos3*<sup>-/-</sup> embryos. G-H: Volume analysis of extracardial populations shows no difference ( $P > 0.05$ ) between SHF cells (G) and neural crest cells (H) between wild type and *Nos3*<sup>-/-</sup> at E11.5. Colour scheme: Anti-NKX2.5 (yellow), Anti-AP2A (Green), Anti-TROPOMYOSIN (red), Nuclei were stained with DAPI (blue). Data are mean  $\pm$  s.d. Analysis was performed using two tailed student T test. Scale bars: 50 μm

|                      |                               |
|----------------------|-------------------------------|
| Fwd_Cre              | ATG-GAT-TTC-CGT-CTC-TGG-TG    |
| Rev_Cre              | TTG-CCC-CTG-TTT-CAC-TAT-CC    |
| Nos3_Mut_oIMR8963    | AAT TCG CCA ATG ACA AGA CG    |
| Nos3_WT_oIMR9357     | AGG GGA ACA AGC CCA GTA GT    |
| Nos3_Common_oIMR9358 | CTT GTC CCC TAG GCA CCT CT    |
| mTmG_WT_oIMR9021     | CCG AAA ATC TGT GGG AAG TC    |
| mTmG_Mut_22163       | CGG GCC ATT TAC CGT AAG TTA T |
| mTmG_Common_oIMR9020 | AAG GGA GCT GCA GTG GAG TA    |

Table S1. **Primers used for genotyping**

|              |               |                            | Experimental Evaluation |                            |                    |                            |
|--------------|---------------|----------------------------|-------------------------|----------------------------|--------------------|----------------------------|
|              | Total embryos |                            | Immuno-staining         |                            | 3D Reconstructions |                            |
| Age          | Wild Type     | <i>Nos3</i> <sup>-/-</sup> | Wild Type               | <i>Nos3</i> <sup>-/-</sup> | Wild type          | <i>Nos3</i> <sup>-/-</sup> |
| <b>E10.5</b> | 3             | 4                          | 3                       | 4                          | 2                  | 2                          |
| <b>E11.0</b> | 7             | 6                          | 7                       | 6                          | 1                  | 0                          |
| <b>E11.5</b> | 11            | 11                         | 11                      | 11                         | 5                  | 3                          |
| <b>E12.0</b> | 4             | 2                          | 4                       | 2                          | 1                  | 0                          |
| <b>E12.5</b> | 20            | 16                         | 20                      | 16                         | 4                  | 4                          |
| <b>E13.5</b> | 14            | 11                         | 14                      | 11                         | 2                  | 1                          |
| <b>E14.5</b> | 8             | 8                          | 8                       | 8                          | 2                  | 4                          |
| <b>E15.5</b> | 3             | 8                          | 3                       | 8                          | 0                  | 0                          |
| <b>E16.5</b> | 4             | 12                         | 4                       | 12                         | 2                  | 1                          |

Table S3.

**Number of embryos used in this study**

| Primary Antibodies                           | Manufacturer                | Dilutions |
|----------------------------------------------|-----------------------------|-----------|
| Nkx2.5                                       | Santa Cruz SC-8697          | 1/4000    |
| eGFP                                         | Abcam ab13970               | 1/500     |
| Tropomyosin                                  | Sigma-Aldrich Chemie T9283  | 1/500     |
| PECAM1                                       | Santa Cruz sc-1506-R        | 1/500     |
| AP2 $\alpha$                                 | GeneTex GTX62588            | 1/2000    |
| Secondary Antibodies                         | Manufacturer                | Dilutions |
| Horse Anti-Goat-Biotin                       | Vector labs BA-9500         | 1/200     |
| HRP~Streptavidine - (PO)                     | Agilent P039701             | 1/200     |
| Alexa Fluor488~Goat anti-Chicken IgY (H+L)   | Thermo Scientific A-11039   | 1/200     |
| Alexa Fluor 594~Donkey Anti-Mouse IgG (H+L)  | Life technologies A-21203   | 1/200     |
| Alexa Fluor 555~Donkey Anti-Rabbit IgG (H+L) | Life technologies A-31572   | 1/200     |
| Cy5-Biotin                                   | LifeSpan Biosciences ab6975 | 1/200     |

Table S2.

**Antibodies used in this study**

| Age         | BAV in WT        | BAV in <i>Nos3</i> <sup>-/-</sup> | Other cardiovascular anomalies in WT | Other cardiovascular anomalies in <i>Nos3</i> <sup>-/-</sup> |
|-------------|------------------|-----------------------------------|--------------------------------------|--------------------------------------------------------------|
| E12.5       | 0/20             | 4/16                              | 0/20                                 | 0/16                                                         |
| E13.5       | 0/14             | 0/11                              | 0/14                                 | 0/11                                                         |
| E14.5       | 0/8              | 2/8                               | 0/8                                  | 0/8                                                          |
| E15.5       | 0/3              | 5/8                               | 0/3                                  | 0/8                                                          |
| E16.5       | 0/4              | 4/12                              | 0/4                                  | 0/12                                                         |
| <b>Mean</b> | <b>0/49 (0%)</b> | <b>15/55 (27.27%)</b>             | <b>0/49 (0%)</b>                     | <b>0/55 (0%)</b>                                             |

Table S4.

**Percentage of BAV found in wild type (WT) and *Nos3*<sup>-/-</sup>.**
